# Supplementary material for: Genomic fitness profiling of Acinetobacter baumannii reveals modes of action for common biocides and mechanisms of biocide-antibiotic antagonism
Source: Research Square preprint supplement (doi:10.21203/rs.3.rs-157820/v1), 2021-02-09
Supplement: Supplementary file 1 [file 58c444c7c2ef0ce09c38e087.xlsx]

## Sheet: TCA
TCA
BAL062	AB5075
locus_tag	locus_tag	gene_name	function	logFC_AgNO3	PValue	q.value	logFC_BZK	PValue	q.value	logFC_CTAB	PValue	q.value	logFC_CHL	PValue	q.value	logFC_TRC	PValue	q.value	logFC_CRL	PValue	q.value	logFC_PVPi	PValue	q.value	logFC_HClO	PValue	q.value	logFC_GLU	PValue	q.value	logFC_EtOH	PValue	q.value
BAL062_03332	ABUW_3296	panB	panB,3-methyl-2-oxobutanoate hydroxymethyltransferase,3-methyl-2-oxobutanoate hydroxymethyltransferase,Ketopantoate hydroxymethyltransferase,3-methyl-2-oxobutanoate hydroxymethyltransferase,Ketopantoate hydroxymethyltransferase	4.17669	4.31e-58	1.69e-55	-1.20069	0.00136579	0.0204464	-2.0968	1.96e-06	4.21e-05	-2.53276	0.216438	0.877915	1.8932	3.5397e-08	7.32367e-07	1.24758	0.00129474	0.0222493	-0.30153	0.502627	1	-1.35944	0.000869642	0.0233925	-1.38236	0.000379411	0.00839888	-1.28973	0.000965182	0.0233495
BAL062_00149	ABUW_0156	BAL062_00149	Pyruvate/2-oxoglutarate dehydrogenase complex, dihydrolipoamide acyltransferase (E2) component-related enzyme,Dihydrolipoyllysine-residue acetyltransferase component of pyruvate dehydrogenase complex,dihydrolipoamide acetyltransferase,Acetyl/propionyl-CoA carboxylase, alpha subunit,dihydrolipoyllysine-residue acetyltransferase,2-oxoacid dehydrogenases acyltransferase (catalytic domain)	-0.87362	4.96e-05	0.000626884	0.49066	6.48915e-08	1.9595e-06	0.80168	1.46e-13	7.56e-12	-0.471479	0.370764	0.989521	1.07005	3.02562e-33	2.3271e-31	0.369449	0.00070408	0.0134727	0.00807348	0.954125	1	-0.423272	0.0318058	0.401859	0.411382	1.84e-06	8.65e-05	0.25609	0.0292686	0.324919
BAL062_00148	ABUW_0155	aceE	aceE,Pyruvate dehydrogenase E1 component,pyruvate dehydrogenase subunit E1,Pyruvate dehydrogenase complex, dehydrogenase (E1) component,pyruvate dehydrogenase (acetyl-transferring), homodimeric type,Transketolase, thiamine diphosphate binding domain	-0.560016	0.00843463	0.0628425	0.552991	9.27343e-10	3.68124e-08	0.766626	3.08e-12	1.28e-10	-0.556951	0.324508	0.975487	1.10626	1.02709e-39	9.08457e-38	0.485683	4.16222e-06	0.000125934	0.0573924	0.683001	1	-0.369713	0.0641172	0.615767	0.460728	5.47e-08	3.42e-06	0.244977	0.0326351	0.349294
BAL062_00350	ABUW_0353	astD	succinylglutamic semialdehyde dehydrogenase,N-succinylglutamate 5-semialdehyde dehydrogenase,succinylglutamic semialdehyde dehydrogenase,Delta 1-pyrroline-5-carboxylate dehydrogenase,succinylglutamic semialdehyde dehydrogenase,Aldehyde dehydrogenase family	1.18987	0.00125326	0.0118909	0.662743	3.85221e-17	2.6686e-15	0.627484	5.24123e-10	1.76255e-08	2.1223	5.30447e-05	0.00387407	1.0002	7.99013e-50	8.83409e-48	0.485618	6.68646e-07	2.44021e-05	0.214536	0.131978	1	0.232674	0.0714365	0.653588	0.296493	7.41916e-05	0.00215107	0.232826	0.0241294	0.289108
BAL062_00351	ABUW_0354	astB	astB,N-succinylarginine dihydrolase,succinylarginine dihydrolase,Succinylarginine dihydrolase,succinylarginine dihydrolase,Succinylarginine dihydrolase	0.821131	0.0590135	0.301805	0.823881	4.36593e-25	6.70644e-23	0.719653	2.18533e-13	1.07172e-11	0.628242	0.236942	0.898003	1.0311	9.62183e-54	1.21579e-51	0.462279	2.62746e-07	1.06911e-05	0.31085	0.0159447	0.515047	0.265778	0.0207947	0.298756	0.391311	2.10784e-07	1.21167e-05	0.17836	0.0690201	0.536731
BAL062_00352	ABUW_0355	astE	astE,Succinylglutamate desuccinylase,succinylglutamate desuccinylase,succinylglutamate desuccinylase,Succinylglutamate desuccinylase / Aspartoacylase family	-1.27947	6.56838e-09	1.35939e-07	-0.253187	0.00890733	0.101138	-0.290703	0.00298999	0.0273389	0.15756	0.744455	1	0.21079	0.00174307	0.0137044	-0.174602	0.078334	0.478108	-0.195713	0.109546	1	-0.516008	2.82274e-05	0.00108144	-0.319465	3.05425e-05	0.000971905	-0.467526	2.28256e-05	0.00083979
BAL062_03127	ABUW_3100	panD	aspartate alpha-decarboxylase,Aspartate 1-decarboxylase precursor,aspartate alpha-decarboxylase,aspartate 1-decarboxylase,Aspartate decarboxylase	2.75004	7.54411e-09	1.54327e-07	0.563712	0.758383	0.967418	-1.67455	0.378037	0.732413	-3.85192	0.439454	1	2.49307	0.0734663	0.244759	1.42282	0.628318	0.952976	0.438864	1	1	-4.06789	0.128779	0.873165	-0.301056	1	1	-4.09501	0.127558	0.72481
BAL062_03359	ABUW_3346	acnA_1	acnA,Aconitate hydratase 1,aconitate hydratase,3-isopropylmalate dehydratase large subunit,aconitate hydratase 1,Aconitase family (aconitate hydratase)	-3.55107	4.55766e-40	7.01285e-38	0.0139869	0.854948	0.993462	0.071128	0.454005	0.790413	-0.177576	0.728402	1	0.035436	0.575708	0.803475	-0.00197738	0.984231	1	0.0685627	0.538391	1	0.0049784	0.96818	1	0.0464369	0.510542	0.921	0.040706	0.697017	1
BAL062_03841	ABUW_3806	acnA_2	aconitate hydratase,Aconitate hydratase 1,aconitate hydratase,3-isopropylmalate dehydratase large subunit,2-methylisocitrate dehydratase, Fe/S-dependent,Aconitase family (aconitate hydratase)	1.26035	0.00666988	0.0522228	0.462455	2.75294e-09	1.02381e-07	0.429576	1.31143e-05	0.000236258	-0.76633	0.263868	0.921659	0.542609	6.16862e-12	1.67881e-10	-0.0290543	0.799208	0.998724	0.256905	0.0209064	0.622488	-0.0643428	0.600538	1	0.357812	1.77267e-06	8.42372e-05	0.24728	0.021606	0.269655
BAL062_00987	ABUW_1072	icd_1	Isocitrate dehydrogenase,Isocitrate dehydrogenase [NADP],Monomeric isocitrate dehydrogenase,isocitrate dehydrogenase, NADP-dependent,Monomeric isocitrate dehydrogenase	-1.31675	4.53852e-11	1.1639e-09	0.399545	4.24675e-06	0.000102766	0.519698	5.43367e-08	1.39031e-06	-2.17471	0.248393	0.910943	0.975085	4.62001e-39	3.98673e-37	-0.0904625	0.611512	0.952164	0.27736	0.0112478	0.427535	-0.802052	2.61027e-14	5.47082e-12	0.455567	2.36918e-05	0.000793732	-1.05402	3.33249e-21	9.80864e-19
BAL062_00989	ABUW_1074	icd_2	isocitrate dehydrogenase,Isocitrate dehydrogenase [NADP],isocitrate dehydrogenase,isocitrate dehydrogenase, NADP-dependent,Isocitrate/isopropylmalate dehydrogenase	-3.64027	5.75484e-25	4.243e-23	-0.163842	0.088945	0.46832	0.434274	0.000132728	0.00190513	-0.985388	0.594964	1	0.278718	0.00123681	0.0101058	0.288467	0.0123548	0.146765	0.240788	0.0316561	0.769437	0.504923	0.00738594	0.13734	0.212879	0.031319	0.262945	0.29956	0.0140516	0.199319
BAL062_01613	ABUW_1722	fumC	fumarate hydratase,Fumarate hydratase class II,fumarate hydratase,Fumarase,fumarate hydratase, class II,Lyase	0.603151	0.000770502	0.00761677	0.173855	0.0112087	0.119279	0.130175	0.0730317	0.29609	1.61003	0.0190855	0.269351	0.0888617	0.132294	0.356479	0.11125	0.103802	0.563924	0.0790806	0.399916	1	0.188857	0.0551679	0.567457	0.145488	0.0495125	0.352662	0.166806	0.010139	0.156379
BAL062_03430	ABUW_3397	fumA	fumarate hydratase,Fumarate hydratase class I, anaerobic,fumarate hydratase,Tartrate dehydratase beta subunit/Fumarate hydratase class I, C-terminal domain,hydrolyase, tartrate alpha subunit/fumarate domain protein, Fe-S type,Fumarate hydratase (Fumerase)	-0.209004	0.372907	0.793341	0.0627757	0.757489	0.967418	-0.70005	5.42552e-05	0.000866855	-3.75189	0.0741317	0.545387	0.0903472	0.57311	0.8024	-0.432905	0.0083268	0.107974	-0.0523642	0.862841	1	-0.240984	0.297527	1	-0.429689	0.010913	0.130013	0.229897	0.278757	0.932958
BAL062_00783	ABUW_0867	gltA	citrate synthase,Citrate synthase,type II citrate synthase,citrate (Si)-synthase,Citrate synthase	0.156426	0.845602	0.991468	-0.620795	0.0263304	0.214466	-0.86834	0.000963741	0.0106676	-4.86878	0.0313519	0.345204	-1.22856	8.9348e-05	0.00100995	-2.56092	1.81982e-11	1.23888e-09	-0.892301	0.00208447	0.140525	-1.5832	2.29e-07	1.34e-05	-0.666644	0.00751946	0.100286	-1.15348	2.02e-05	0.000773749
BAL062_00791	ABUW_0875	sucC	succinyl-CoA synthetase subunit beta,Succinyl-CoA ligase [ADP-forming] subunit beta,succinyl-CoA synthetase subunit beta,Succinyl-CoA synthetase, beta subunit,succinate-CoA ligase, beta subunit,ATP-grasp domain	3.61759	7.566e-127	2.67761e-123	-0.777169	1.73275e-06	4.40417e-05	-0.733081	2.56468e-06	5.3904e-05	-2.03039	0.299873	0.956003	-0.425293	0.00814357	0.0485868	-0.260141	0.0872364	0.510441	-0.162189	0.617636	1	-0.0870544	0.658029	1	-0.47106	0.0162462	0.167345	0.529668	0.00720849	0.122942
BAL062_00792	ABUW_0876	sucD	succinyl-CoA synthetase subunit alpha,Succinyl-CoA ligase [ADP-forming] subunit alpha,succinyl-CoA synthetase subunit alpha,Succinyl-CoA synthetase, alpha subunit,succinate-CoA ligase, alpha subunit,CoA binding domain	3.61675	1.90524e-73	1.68566e-70	-0.718094	0.00145884	0.0217471	-0.778614	3.08528e-06	6.4083e-05	-1.84713	0.327116	0.975487	-0.450537	9.69515e-06	0.000136117	-0.151614	0.170819	0.680769	-0.286714	0.347537	1	-0.169108	0.348101	1	-0.432142	0.0294334	0.252165	0.604252	0.000786858	0.0197105
																			5.90084

## Sheet: Nucleotide
Nucleotide
BAL062	AB5075
locus_tag	locus_tag	gene_name	function	logFC_AgNO3	PValue	q.value	logFC_BZK	PValue	q.value	logFC_CTAB	PValue	q.value	logFC_CHL	PValue	q.value	logFC_TRC	PValue	q.value	logFC_CRL	PValue	q.value	logFC_PVPi	PValue	q.value	logFC_HClO	PValue	q.value	logFC_GLU	PValue	q.value	logFC_EtOH	PValue	q.value
BAL062_00055	ABUW_0059	purC	phosphoribosylaminoimidazole-succinocarboxamide synthase,Phosphoribosylaminoimidazole-succinocarboxamide synthase,phosphoribosylaminoimidazole-succinocarboxamide synthase,Phosphoribosylaminoimidazolesuccinocarboxamide (SAICAR) synthase,phosphoribosylaminoimidazolesuccinocarboxamide synthase,SAICAR synthetase	0.123151	0.387847	0.805338	0.252074	0.0308045	0.238145	0.478895	1.41468e-05	0.000252284	2.91834	0.00341515	0.115764	0.476037	8.91716e-08	1.76251e-06	0.634961	4.05105e-11	2.51592e-09	0.439749	0.000610427	0.0559245	0.522829	0.000625124	0.0173552	0.790668	5.36648e-13	5.97692e-11	1.29179	7.03754e-37	4.97132e-34
BAL062_00893	ABUW_0980	purN	phosphoribosylglycinamide formyltransferase,Phosphoribosylglycinamide formyltransferase,phosphoribosylglycinamide formyltransferase,Folate-dependent phosphoribosylglycinamide formyltransferase PurN,phosphoribosylglycinamide formyltransferase,Formyl transferase	0.428362	0.003122	0.0266878	0.150637	0.164676	0.631807	0.115252	0.3474	0.708648	2.30126	0.0595756	0.479581	0.0240953	0.840772	0.956906	0.548891	3.04419e-06	9.53668e-05	0.270816	0.0405068	0.866651	0.365581	0.00630694	0.123471	0.397776	8.85641e-05	0.00244684	0.915442	2.49691e-20	6.29934e-18
BAL062_00894	ABUW_0981	purM	phosphoribosylaminoimidazole synthetase,Phosphoribosylformylglycinamidine cyclo-ligase,phosphoribosylaminoimidazole synthetase,Phosphoribosylamine-glycine ligase,phosphoribosylformylglycinamidine cyclo-ligase,AIR synthase related protein, C-terminal domain	1.12228	1.01591e-15	3.63162e-14	-0.310743	0.0091869	0.103367	-0.537179	5.21326e-06	0.000102838	-0.172753	0.933935	1	-0.352458	0.00968218	0.0550541	0.0662893	0.656673	0.964883	0.341784	0.0513281	0.894612	0.212717	0.0968311	0.754208	0.32687	0.00213546	0.0355644	0.710502	9.98534e-12	1.13768e-09
BAL062_01293	ABUW_1446	purF	purF,Amidophosphoribosyltransferase,amidophosphor ibosyltransferase,Glutamine phosphoribosylpyrophosphate amidotransferase,amidophosphoribosyltransferase,Glutamine amidotransferases class-II	0.821394	5.22405e-11	1.30197e-09	-0.261699	0.0502309	0.32864	-0.552992	1.70467e-05	0.000300679	2.09896	0.142214	0.753005	-0.860444	1.29986e-14	4.46497e-13	-0.279654	0.0212125	0.215054	0.0102796	0.959976	1	0.0650809	0.712242	1	-0.0913599	0.504522	0.921	0.564434	5.02888e-06	0.000240027
BAL062_01358	ABUW_1531	purD	purD,Phosphoribosylamine--glycine ligase,phosphoribosylamine--glycine ligase,Phosphoribosylamine-glycine ligase,phosphoribosylamine--glycine ligase,Phosphoribosylglycinamide synthetase, ATP-grasp (A) domain	0.622518	0.00158049	0.014566	-0.643781	0.00332757	0.0439553	-1.0761	1.33771e-10	4.81984e-09	1.65415	0.403462	1	-1.10055	9.20388e-06	0.000131687	-0.345632	0.131538	0.613246	0.0175385	0.953323	1	0.153282	0.428945	1	-0.38722	0.0167853	0.170934	0.631915	0.000261667	0.00757546
BAL062_01359	ABUW_1532	purH	bifunctional protein purH,Bifunctional purine biosynthesis protein PurH,bifunctional phosphoribosylaminoimidazolecarboxamide formyltransferase/IMP cyclohydrolase,Folate-dependent phosphoribosylglycinamide formyltransferase PurN,phosphoribosylaminoimidazolecarboxamide formyltransferase/IMP cyclohydrolase,AICARFT/IMPCHase bienzyme	0.227869	0.0906342	0.401445	0.570324	3.17313e-05	0.000650362	0.175044	0.138994	0.434325	3.4915	0.000104964	0.00679832	0.379355	0.000850384	0.00744717	0.658626	1.1767e-06	4.08384e-05	0.53571	0.00183665	0.128673	0.703333	4.13914e-09	3.07245e-07	0.470058	8.08376e-05	0.00226992	0.993483	1.67629e-15	2.46694e-13
BAL062_02214	ABUW_2350	purT	purT,Phosphoribosylglycinamide formyltransferase 2,phosphoribosylglycinamide formyltransferase 2,Formate-dependent phosphoribosylglycinamide formyltransferase (GAR transformylase),phosphoribosylglycinamide formyltransferase 2,ATP-grasp domain	0.822284	3.35668e-11	8.67101e-10	-0.0926699	0.153263	0.610667	-0.0931539	0.162973	0.48128	1.42117	0.0171065	0.250903	-0.08898	0.102439	0.305454	0.0774084	0.199275	0.726501	0.00290367	0.975334	1	0.130498	0.142922	0.899704	0.0503632	0.470175	0.921	0.0690864	0.3223	0.957646
BAL062_02593	ABUW_2755	purP	transporter,Probable adenine permease PurP,Permeases,Permease family	0.384281	0.013515	0.0949	-0.00760223	0.931952	1	0.197879	0.016758	0.103201	1.21144	0.203526	0.859512	0.00811176	0.922158	0.990318	-0.118207	0.181281	0.695269	-0.0521432	0.622365	1	-0.0148762	0.887562	1	0.0468821	0.595095	0.9558	-0.197305	0.0168493	0.22628
BAL062_03921	ABUW_3885	purK	purK,N5-carboxyaminoimidazole ribonucleotide synthase,phosphoribosylaminoimidazole carboxylase ATPase subunit,Phosphoribosylaminoimidazole carboxylase (NCAIR synthetase),phosphoribosylaminoimidazole carboxylase, ATPase subunit,ATP-grasp domain	-0.0575893	0.697521	0.943068	0.716898	1.11809e-19	9.87549e-18	0.669504	2.89601e-13	1.38187e-11	2.95101	2.07414e-07	2.78627e-05	0.870065	7.44567e-36	5.987e-34	0.840631	1.08924e-26	1.83614e-24	0.516951	1.08047e-07	3.50958e-05	0.443286	4.16427e-08	2.55815e-06	0.618661	1.306e-18	4.23143e-16	0.961078	3.09322e-32	1.56075e-29
BAL062_03922	ABUW_3886	purE	purE,N5-carboxyaminoimidazole ribonucleotide mutase,Phosphoribosylcarboxyaminoimidazole (NCAIR) mutase,phosphoribosylaminoimidazole carboxylase, catalytic subunit,AIR carboxylase	0.559012	2.23099e-05	0.000304844	0.876879	1.79302e-11	8.56045e-10	0.692676	1.20086e-07	3.00726e-06	4.70877	4.78223e-12	2.16814e-09	0.936735	7.44209e-15	2.65961e-13	1.04339	1.01118e-14	8.13543e-13	0.807544	1.64305e-09	1.17412e-06	0.778955	3.58168e-09	2.71522e-07	0.831646	3.73941e-12	3.80779e-10	1.65245	6.8652e-49	8.08263e-46
BAL062_02637	ABUW_2825	pyrC_2	dihydroorotase,Dihydroorotase,dihydroorotase,Dihy droorotase,dihydroorotase, homodimeric type,Amidohydrolase family	5.16652	5.65958e-16	2.06487e-14	0.271625	0.161199	0.624764	0.582146	0.000576356	0.00682924	-3.84353	0.0658127	0.503533	1.19536	1.18975e-11	3.1413e-10	0.863326	2.39861e-06	7.58131e-05	0.534867	0.0626126	0.939552	0.0302952	0.902387	1	0.215398	0.225821	0.745209	0.0988362	0.684975	1
BAL062_01291	ABUW_1444	pyrD	pyrD,Dihydroorotate dehydrogenase (quinone),dihydroorotate dehydrogenase 2,Dihydroorotate dehydrogenase,dihydroorotate dehydrogenase (fumarate),Dihydroorotate dehydrogenase	3.30724	1.02492e-21	6.04534e-20	0.428666	0.0106331	0.115819	1.00246	1.16066e-11	4.65715e-10	-3.77719	0.119688	0.695684	0.930949	8.0646e-13	2.3977e-11	0.630273	4.13279e-05	0.00106015	0.600658	0.000208559	0.0219171	0.248772	0.224231	1	0.609944	6.94102e-06	0.000284342	0.315611	0.035689	0.366434
BAL062_00135	ABUW_0142	pyrE	orotate phosphoribosyltransferase,Orotate phosphoribosyltransferase,orotate phosphoribosyltransferase,orotate phosphoribosyltransferase,Phosphoribosyl transferase domain	1.15717	8.15486e-05	0.00100909	0.388966	7.27856e-09	2.57151e-07	0.471524	1.33706e-10	4.81984e-09	0.319878	0.637224	1	0.53933	1.46305e-21	7.50182e-20	0.495787	2.82997e-11	1.82147e-09	0.284952	0.00867531	0.352237	0.294352	0.00254095	0.0580346	0.459221	8.51236e-11	7.39953e-09	-0.0374432	0.65587	0.993317
BAL062_02567	ABUW_2731	pyrC_1	pyrX,Dihydroorotase,dihydroorotase,Carbamoylphosp hate synthase small subunit,dihydroorotase, multifunctional complex type	1.7061	2.78248e-05	0.000370195	0.363089	0.00150209	0.0222978	0.644903	3.73615e-11	1.40344e-09	1.23346	0.438584	1	0.2879	0.00328799	0.0228994	0.615012	4.68731e-07	1.7842e-05	0.525664	1.70085e-05	0.00243085	0.533516	8.71179e-07	4.4343e-05	0.441618	1.24985e-05	0.000449948	-0.127596	0.284204	0.933187
BAL062_02104	ABUW_2239	pyrF	orotidine 5'-phosphate decarboxylase,Orotidine 5'-phosphate decarboxylase,orotidine 5'-phosphate decarboxylase,Orotidine-5'-phosphate decarboxylase,orotidine 5'-phosphate decarboxylase,Orotidine 5'-phosphate decarboxylase / HUMPS family	1.18265	0.000452089	0.00484294	0.551769	1.05209e-10	4.64629e-09	0.568331	1.71543e-11	6.65624e-10	1.01577	0.458583	1	0.783811	1.33235e-22	7.3654e-21	0.682548	2.14406e-09	1.18002e-07	0.27569	0.0353954	0.81592	0.38908	5.57625e-05	0.00192895	0.574912	4.73464e-11	4.21856e-09	-0.0582687	0.551836	0.990582
BAL062_02568	ABUW_2732	pyrB	aspartate carbamoyltransferase,Aspartate carbamoyltransferase,aspartate carbamoyltransferase catalytic subunit,Aspartate carbamoyltransferase, catalytic chain,aspartate carbamoyltransferase,Aspartate/ornithine carbamoyltransferase, carbamoyl-P binding domain	1.39922	0.000201409	0.00229931	0.523441	1.80259e-05	0.000390708	0.923976	3.3336e-23	3.56695e-21	0.051177	0.979092	1	0.495367	8.06649e-08	1.60333e-06	0.628662	7.31056e-10	4.10784e-08	0.62067	1.79843e-07	5.35482e-05	0.660524	7.53861e-10	6.10456e-08	0.667022	1.80291e-12	1.94714e-10	-0.00336151	0.985791	1

## Sheet: Amino acid
Amino acid biosynthesis
BAL062	AB5075
locus_tag	locus_tag	gene_name	function	logFC_AgNO3	PValue	q.value	logFC_BZK	PValue	q.value	logFC_CTAB	PValue	q.value	logFC_CHL	PValue	q.value	logFC_TRC	PValue	q.value	logFC_CRL	PValue	q.value	logFC_PVPi	PValue	q.value	logFC_HClO	PValue	q.value	logFC_GLU	PValue	q.value	logFC_EtOH	PValue	q.value
BAL062_03672	ABUW_3636	hom_2	homoserine dehydrogenase,Homoserine dehydrogenase,homoserine dehydrogenase,Homoserine dehydrogenase,Homoserine dehydrogenase	-3.73627	4.53614e-66	2.67556e-63	-0.497476	4.74216e-07	1.28877e-05	0.272721	0.000157267	0.00219699	-1.47119	0.23332	0.894558	0.343376	0.000121395	0.00135488	0.041319	0.640737	0.957244	-0.00600846	0.961592	1	-0.68058	0.20849	1	0.315518	3.33131e-05	0.00104147	-0.30426	1.75547e-05	0.000696664
BAL062_03673	ABUW_3637	thrC	threonine synthase,Threonine synthase,threonine synthase,Threonine dehydratase,threonine synthase,Pyridoxal-phosphate dependent enzyme	-3.80306	1.20345e-78	1.41967e-75	-0.195816	0.330671	0.8189	1.255	3.17049e-29	4.42756e-27	-4.1439	0.047078	0.427702	1.03227	8.6484e-18	3.47705e-16	0.50606	0.000187124	0.00419252	0.237578	0.242299	1	-0.696057	0.377453	1	0.939777	3.7005e-17	8.24286e-15	0.0242762	0.856112	1
BAL062_00330	ABUW_0331	serA	D-3-phosphoglycerate dehydrogenase,D-3-phosphoglycerate dehydrogenase,D-3-phosphoglycerate dehydrogenase,Phosphoserine aminotransferase,phosphoglycerate dehydrogenase,D-isomer specific 2-hydroxyacid dehydrogenase, NAD binding domain	-3.23492	5.33177e-29	5.71792e-27	-0.317287	0.00101347	0.0156358	-0.232341	0.00966383	0.067839	1.63632	0.0945573	0.614887	-0.410222	0.00341834	0.0236213	-0.626054	0.000500214	0.0101186	-0.0405623	0.819469	1	-0.486762	3.30571e-05	0.00123981	0.237827	0.00894455	0.115052	-0.0539559	0.572385	0.990582
BAL062_00089	ABUW_0097	serB	phosphoserine phosphatase SerB,Phosphoserine phosphatase,phosphoserine phosphatase,ACT domain-containing protein,phosphoserine phosphatase SerB,haloacid dehalogenase-like hydrolase	-2.97472	8.09606e-27	7.16299e-25	-0.388109	7.2517e-06	0.000171948	-0.334642	9.53179e-05	0.00141415	-0.0375489	0.981479	1	0.0524336	0.734698	0.900992	-0.274661	0.0753371	0.468706	-0.137752	0.388504	1	-0.422303	0.000481814	0.0139569	0.379066	8.56593e-06	0.000331837	-0.331124	7.40565e-05	0.00253949
BAL062_01268	ABUW_1365	pheA	bifuctional chorismate mutase P/prephenate dehydratase,P-protein,prephenate dehydratase,Prephenate dehydrogenase,chorismate mutase,Prephenate dehydratase [tyrosine biosynthesis]	-1.69281	5.81257e-06	8.60697e-05	0.106524	0.549932	0.916036	0.220633	0.204898	0.54235	-6.26109	0.0144568	0.226012	0.307313	0.0314987	0.135575	-0.258199	0.161239	0.669937	-0.0158623	0.956628	1	-0.254799	0.218611	1	-0.220607	0.192287	0.689447	-0.588828	0.00140923	0.0323208
BAL062_03652	ABUW_3617	argH	argininosuccinate lyase,Argininosuccinate lyase,argininosuccinate lyase,Argininosuccinate lyase,argininosuccinate lyase,Lyase [argeinine biosynthesis]	-3.24357	1.91152e-20	1.02498e-18	0.121305	0.126637	0.562079	0.270913	0.00290625	0.0268638	3.73574	5.67171e-06	0.00054135	0.348218	2.99226e-06	4.68434e-05	-0.396322	0.000237591	0.00522405	0.0727345	0.597914	1	0.372299	0.00486585	0.099638	0.224572	0.00125291	0.0227825	0.149512	0.138606	0.746193
BAL062_00864	ABUW_0953	lysA	lysA,Diaminopimelate decarboxylase,bifunctional aspartate kinase/diaminopimelate decarboxylase protein,Diaminopimelate decarboxylase,diaminopimelate decarboxylase,Pyridoxal-dependent decarboxylase, pyridoxal binding domain [lysine biosynthesis]	-0.787204	0.000647319	0.00669843	0.180133	0.133813	0.572349	-0.332757	0.0147434	0.0943094	-0.521597	0.788105	1	0.57603	6.41123e-06	9.53064e-05	-0.872377	0.000114359	0.00269888	-0.0637148	0.758996	1	-1.05944	1.34623e-12	1.5473e-10	-0.030419	0.79878	1	-2.83041	1.96056e-57	3.46235e-54
BAL062_00620	ABUW_0622	trpA	trpA,Tryptophan synthase alpha chain,tryptophan synthase subunit alpha,Tryptophan synthase alpha chain,tryptophan synthase, alpha subunit,Tryptophan synthase alpha chain	0.283655	0.188058	0.598503	-0.448741	0.104456	0.504072	-1.9964	4.1e-08	1.08e-06	-1.10434	0.0293299	0.334527	0.397304	7.55486e-06	0.000110451	-1.41309	9.43886e-16	8.56758e-14	-0.720404	0.00145086	0.110297	-2.12228	3.29e-51	1.17e-47	-1.44917	7.68e-59	2.74e-55	-1.88859	5.57e-46	4.92e-43
BAL062_01622	ABUW_1730	argF	argF,Ornithine carbamoyltransferase,ornithine carbamoyltransferase,Ornithine carbamoyltransferase,ornithine carbamoyltransferase,Aspartate/ornithine carbamoyltransferase, Asp/Orn binding domain	-1.34433	1.23e-07	2.22e-06	0.0244536	0.873799	0.993462	-0.190799	0.290479	0.64974	-4.55531	0.0349444	0.365309	-0.084651	0.498726	0.752252	-1.40908	1.91792e-17	1.99689e-15	-0.270248	0.111294	1	0.127325	0.399813	1	0.100883	0.441942	0.91537	-0.114868	0.507218	0.989585
BAL062_00023	ABUW_0026	ilvD_1	Dihydroxy-acid dehydratase 1,Dihydroxy-acid dehydratase,dihydroxy-acid dehydratase,Dihydroxyacid dehydratase/phosphogluconate dehydratase,dihydroxy-acid dehydratase,Dehydratase family	0.108562	0.469856	0.864516	-0.459476	4.39259e-07	1.20302e-05	-0.757873	3.42027e-14	1.88703e-12	-1.91992	0.000354916	0.0195043	0.346487	9.35983e-08	1.83973e-06	-0.260137	0.0052991	0.0741455	-0.128431	0.373032	1	-0.399026	0.00208173	0.0484785	-0.434438	3.0442e-07	1.64387e-05	-0.348249	0.00163038	0.0369134
BAL062_02226	ABUW_2362	cysE_1	Serine acetyltransferase,Serine acetyltransferase,serine acetyltransferase,Acetyltransferase (isoleucine patch superfamily),serine O-acetyltransferase,Bacterial transferase hexapeptide (six repeats)	1.04572	0.0254765	0.159015	-0.528482	0.0831469	0.44712	-1.11929	0.000325596	0.00421129	-5.44843	0.0254884	0.30015	-0.378571	0.254942	0.521335	-0.597172	0.100179	0.552389	-0.575685	0.0684885	0.954567	-1.2631	0.000208382	0.00645622	0.4762	0.0625337	0.405259	-0.14215	0.693852	1
BAL062_03341	ABUW_3305	cysM	cysteine synthase B,Cysteine synthase B,cysteine synthase B,Cysteine synthase,cysteine synthase B,Pyridoxal-phosphate dependent enzyme	1.65638	1.07e-29	1.19e-27	-0.197269	0.135624	0.576645	-0.481787	9.9e-05	0.00145613	-0.190134	0.90269	1	-0.242395	0.00764255	0.0462978	0.014255	0.899678	1	-0.117506	0.468625	1	-1.94946	1.18e-38	8.42e-36	-0.62379	2.7e-05	0.000867835	0.134492	0.266989	0.916072
BAL062_00375	ABUW_0376	aroE	shikimate 5-dehydrogenase,Shikimate dehydrogenase,shikimate 5-dehydrogenase,5-enolpyruvylshikimate-3-phosphate synthase,shikimate 5-dehydrogenase,Shikimate dehydrogenase substrate binding domain	-1.74282	0.000547637	0.005751	0.273099	0.119834	0.541397	-0.262904	0.0972083	0.356061	-5.05111	0.0239029	0.298543	0.795626	2.44664e-10	5.9289e-09	-0.41045	0.0117204	0.140847	0.268174	0.307375	1	-0.776838	2.39123e-05	0.000957299	-0.318489	0.0592473	0.394687	-1.77817	1.28833e-18	2.84398e-16
BAL062_01997	ABUW_2136	aroC	chorismate synthase,Chorismate synthase,chorismate synthase,Chorismate synthase,chorismate synthase,Chorismate synthase	-1.74786	0.00403368	0.0341512	0.0334772	0.891671	0.997842	-0.206698	0.342421	0.705419	-3.59153	0.0830961	0.579596	0.496382	0.00837231	0.0494511	-0.39322	0.110931	0.57105	-0.104639	0.740075	1	-0.280071	0.223683	1	0.0635398	0.743291	0.983312	-0.986146	7.29369e-06	0.000334563
BAL062_01707	ABUW_1816	aroF_1	Phospho-2-dehydro-3-deoxyheptonate aldolase,Phospho-2-dehydro-3-deoxyheptonate aldolase, Tyr-sensitive,phospho-2-dehydro-3-deoxyheptonate aldolase,3-deoxy-D-arabino-heptulosonate 7-phosphate (DAHP) synthase,3-deoxy-7-phosphoheptulonate synthase,DAHP synthetase I family	-0.626722	2.87232e-05	0.000379296	0.219629	0.00893149	0.101138	-0.100033	0.201947	0.538986	2.19487	0.000109597	0.00697385	0.4344	2.13157e-13	6.67388e-12	0.181456	0.0101314	0.126545	0.171308	0.311781	1	0.00979816	0.924282	1	0.0708978	0.461891	0.921	-0.159183	0.111721	0.683584
BAL062_03427	ABUW_3394	ilvD_4	Phosphogluconate dehydratase,Dihydroxy-acid dehydratase,phosphogluconate dehydratase,Dihydroxyacid dehydratase/phosphogluconate dehydratase,phosphogluconate dehydratase,Dehydratase family	-0.511248	0.0221613	0.143119	0.658593	2.7513e-08	8.83667e-07	1.33067	6e-37	1.25e-34	3.06572	8.37e-08	1.32e-05	1.1958	7.0419e-47	6.92062e-45	0.806639	1.43497e-07	6.04736e-06	0.294337	0.00787893	0.339174	0.398546	0.00124885	0.0315577	1.00884	2.72e-37	4.85e-34	0.42785	0.00010258	0.00333142
BAL062_00826	ABUW_0913	pckG	phosphoenolpyruvate carboxykinase,Phosphoenolpyruvate carboxykinase [GTP],phosphoenolpyruvate carboxykinase,Phosphoenolpyruvate carboxykinase	0.49771	0.0146	0.10072	0.76676	1.46049e-07	4.16123e-06	0.0938361	0.493983	0.808448	2.17885	4.21071e-05	0.00332005	0.00348002	0.968728	1	0.2002	0.0778935	0.478108	0.735491	9.17731e-05	0.0105776	-0.184901	0.203709	1	0.396156	0.000558119	0.0115648	-0.435174	0.00171797	0.0386488
																			2.66306
																			2.65567

## Sheet: Others
Others
BAL062	AB5075
locus_tag	locus_tag	gene_name	function	logFC_AgNO3	PValue	q.value	logFC_BZK	PValue	q.value	logFC_CTAB	PValue	q.value	logFC_CHL	PValue	q.value	logFC_TRC	PValue	q.value	logFC_CRL	PValue	q.value	logFC_PVPi	PValue	q.value	logFC_HClO	PValue	q.value	logFC_GLU	PValue	q.value	logFC_EtOH	PValue	q.value
BAL062_00912	ABUW_0999	ruvB	Holliday junction DNA helicase RuvB,Holliday junction ATP-dependent DNA helicase RuvB,Holliday junction DNA helicase RuvB,Holliday junction resolvasome, helicase subunit,Holliday junction DNA helicase RuvB,Holliday junction DNA helicase ruvB N-terminus	0.390413	0.147029	0.524005	-0.176146	0.266556	0.753532	0.249002	0.140023	0.436204	-0.980966	0.633298	1	-0.041776	0.855483	0.960408	0.0840243	0.693198	0.970237	-0.210793	0.236344	1	-1.09126	1.45755e-08	9.79857e-07	-2.07543	1.9055e-25	2.26374e-22	-0.235229	0.157066	0.792454
BAL062_00913	ABUW_1000	ruvA	ruvA,Holliday junction ATP-dependent DNA helicase RuvA,Holliday junction DNA helicase RuvA,Holliday junction DNA helicase RuvA,RuvA N terminal domain	0.436063	0.166898	0.562043	0.0973925	0.67246	0.95246	0.548569	0.00150997	0.015321	-0.176905	0.943236	1	-0.335453	0.0524113	0.194372	0.0388759	0.849812	1	0.203366	0.342145	1	-0.940355	0.000106045	0.00356452	-1.85283	4.1437e-14	5.09247e-12	-0.0191179	0.950359	1
BAL062_02168	ABUW_2304	ruvC	Holliday junction resolvase,Crossover junction endodeoxyribonuclease RuvC,Holliday junction resolvase,crossover junction endodeoxyribonuclease RuvC,Crossover junction endodeoxyribonuclease RuvC	-0.0850709	0.829332	0.988847	-0.11902	0.559427	0.916476	-0.127485	0.488903	0.808448	-1.97675	0.357874	0.987714	0.355499	0.0852742	0.270583	0.331405	0.143312	0.627103	-0.26288	0.177382	1	-0.871755	2.2837e-05	0.000924637	-1.78267	6.77507e-17	1.42037e-14	-0.842106	1.63489e-05	0.000671845
BAL062_01029	ABUW_1125	nudJ	Putative Nudix hydrolase,Phosphatase nudJ,NADH pyrophosphatase,NTP pyrophosphohydrolases containing a Zn-finger, probably nucleic-acid-binding,nucleoside triphosphatase YtkD,NUDIX domain	-0.321882	0.0286616	0.175187	0.144834	0.130959	0.569102	0.0245605	0.767387	0.950937	-2.17308	0.2304	0.888999	0.556786	1.13352e-10	2.76579e-09	0.14371	0.125203	0.601384	-0.634082	6.61983e-07	0.000157684	-0.652896	2.63073e-11	2.46666e-09	-0.0959125	0.295852	0.814186	-0.781153	9.73244e-17	1.80921e-14
BAL062_03502	ABUW_3467	nudH	dinucleoside polyphosphate hydrolase,RNA pyrophosphohydrolase,RNA pyrophosphohydrolase,mutator mutT protein,NUDIX domain	-0.482767	0.00491168	0.0401442	-0.186023	0.37668	0.834365	-1.50923	3.47204e-13	1.63463e-11	-2.04771	0.000509851	0.0260455	0.810316	3.03848e-20	1.39612e-18	-0.490581	1.27738e-06	4.348e-05	-0.0182783	0.957983	1	-1.08598	1.30524e-11	1.25691e-09	-0.651994	3.5153e-07	1.86993e-05	-0.859644	5.52618e-06	0.000260246
BAL062_02171	ABUW_2307	bioB	biotin synthetase,Biotin synthase,biotin synthase,biotin synthase,Biotin and Thiamin Synthesis associated domain	1.37611	0.00481886	0.0395684	-0.633755	0.00311295	0.0418438	-0.853037	0.000116037	0.00168612	-1.08328	0.575385	1	0.422475	0.0443615	0.17439	-0.350701	0.155144	0.656947	-0.22133	0.330096	1	-1.30415	2.36596e-07	1.35967e-05	-0.506836	0.0120685	0.140105	-0.304229	0.156867	0.792454
BAL062_03145	ABUW_3117	bioD1	Dethiobiotin synthetase,ATP-dependent dethiobiotin synthetase BioD 1,dithiobiotin synthetase,dethiobiotin synthase	1.00997	0.000707505	0.00715388	-1.19149	8.4076e-25	1.23767e-22	-1.47323	1.56422e-24	1.72601e-22	-3.09673	0.149681	0.777753	0.693825	1.92736e-06	3.08552e-05	-0.222604	0.149904	0.643223	-0.0572002	0.762297	1	-0.295034	0.131007	0.873165	-0.799757	7.34567e-14	8.72666e-12	-0.49897	2.22881e-06	0.000117495
BAL062_03146	ABUW_3118	bioC	bioC,Malonyl-CoA O-methyltransferase BioC,biotin biosynthesis protein BioC,Uncharacterized protein conserved in bacteria,biotin biosynthesis protein BioC,Methyltransferase domain	1.27167	2.82869e-05	0.000374934	-1.23108	1.38624e-33	3.06098e-31	-1.38173	5.71641e-19	4.92309e-17	-2.19626	0.247376	0.91046	0.574089	5.64117e-07	1.00294e-05	-0.418972	0.000735633	0.0139259	-0.0149777	0.928834	1	-0.265408	0.122405	0.87226	-0.808842	8.48084e-15	1.11947e-12	-0.424619	7.07489e-06	0.000328796
BAL062_03147	ABUW_3119	bioF	bioF,8-amino-7-oxononanoate synthase,8-amino-7-oxononanoate synthase,7-keto-8-aminopelargonate synthetase and related enzymes,8-amino-7-oxononanoate synthase,Aminotransferase class I and II	1.3355	1.12883e-05	0.000162395	-1.08944	1.55543e-29	2.89227e-27	-1.371	3.12875e-22	3.24929e-20	-2.04133	0.220643	0.881099	0.667722	4.98779e-12	1.36797e-10	-0.350182	0.00471138	0.0675234	0.041295	0.786287	1	-0.231685	0.157074	0.928722	-0.696932	3.38378e-12	3.547e-10	-0.471249	1.10038e-07	7.47415e-06
BAL062_03148	ABUW_3120	bioA	bioA,Adenosylmethionine-8-amino-7-oxononanoate aminotransferase,adenosylmethionine--8-amino-7-oxononanoate transaminase,Ornithine/acetylornithine aminotransferase,adenosylmethionine-8-amino-7-oxononanoate transaminase,Aminotransferase class-III	1.20341	2.94904e-05	0.00038798	-1.21052	1.68177e-51	8.48815e-49	-1.38409	8.80056e-19	7.22669e-17	-1.27921	0.323757	0.975487	0.600347	2.47231e-09	5.60707e-08	-0.428876	0.000681851	0.0131899	-0.0613613	0.76335	1	-0.398622	0.0239836	0.332508	-0.792939	6.31127e-21	2.81167e-18	-0.637686	1.17495e-16	1.98199e-14
BAL062_03149	ABUW_3121	bioH_2	carboxylesterase BioH,Pimelyl-[acyl-carrier protein] methyl ester esterase,carboxylesterase BioH,pimelyl-[acyl-carrier protein] methyl ester esterase	1.1779	8.52807e-07	1.40376e-05	-0.77465	6.80078e-18	5.33937e-16	-0.943391	4.80185e-17	3.26064e-15	-1.9536	0.2352	0.896447	0.624984	1.91616e-15	7.1362e-14	-0.0934388	0.300062	0.814511	0.0256881	0.868307	1	-0.12271	0.309747	1	-0.838409	2.41511e-22	1.40824e-19	-0.448707	3.15331e-07	1.92026e-05
BAL062_03888	ABUW_3848	gph_3	Pgp 2,Phosphoglycolate phosphatase,phosphoglycolate phosphatase,phosphoglycolate phosphatase, bacterial,haloacid dehalogenase-like hydrolase (the knockout of the other gph gene [0369, 87% query and 30% identity] has no effect on any drug; 98% query and 78% identity to ACIAD0034 in ADP1 which is betalactam resistant gene. Its homolog from E. coli was speculated to function in DNA repair)	-0.366895	0.0617392	0.310362	0.883446	1.13637e-15	7.04348e-14	0.464619	3.30174e-06	6.70607e-05	3.63078	2.67401e-07	3.4638e-05	0.961321	8.46372e-28	5.64882e-26	0.288777	0.00824639	0.10772	0.40364	0.00677064	0.310147	-0.173946	0.150219	0.916352	0.529538	5.92855e-12	5.86926e-10	-0.166861	0.133032	0.740931
BAL062_01014	ABUW_1110	ddc	L-2,4-diaminobutyrate decarboxylase,L-2,4-diaminobutyrate decarboxylase,L-tyrosine decarboxylase,4-aminobutyrate aminotransferase and related aminotransferases,putative pyridoxal-dependent aspartate 1-decarboxylase,Pyridoxal-dependent decarboxylase conserved domain	0.755417	2.54e-07	4.45e-06	1.13904	7.52488e-61	6.64635e-58	-0.71897	6.9e-17	4.6e-15	0.361047	0.752655	1	0.312846	0.00736124	0.0449212	1.15197	8.83531e-18	9.77406e-16	0.0719384	0.715198	1	0.281085	0.128868	0.873165	-0.737953	1.99e-15	2.96e-13	-0.618422	1.36e-08	1.12e-06
BAL062_01013	ABUW_1109	dat	diaminobutyrate--2-oxoglutarate aminotransferase,Diaminobutyrate--2-oxoglutarate aminotransferase,diaminobutyrate--2-oxoglutarate aminotransferase,4-aminobutyrate aminotransferase and related aminotransferases,2,4-diaminobutyrate 4-transaminase,Aminotransferase class-III	0.243701	0.237648	0.66749	1.35603	2.70868e-59	1.91395e-56	-0.820463	4.66e-13	2.17e-11	0.769471	0.513463	1	0.104631	0.2636	0.532316	1.43027	1.71015e-21	2.42157e-19	0.439307	0.0343665	0.802558	0.961853	2.85e-06	0.000128727	-0.597272	2.38e-08	1.6e-06	0.390501	2.06e-05	0.000783026
BAL062_02074	ABUW_2209	BAL062_02074	histidine triad protein,HIT domain	1.95889	3.1e-11	8.07e-10	0.478105	0.0297116	0.234211	2.84549	3.26e-29	4.43e-27	3.90331	0.0489928	0.435532	0.876592	2.26e-06	3.56e-05	0.141701	0.488878	0.913682	0.654796	0.022861	0.639124	0.322858	0.191167	1	1.09234	6.53e-07	3.37e-05	0.291326	0.190859	0.853742
BAL062_00719	ABUW_0721	waxdgaT	wax-dgaT,Diacylglycerol O-acyltransferase,acyltransferase, WS/DGAT/MGAT,Wax ester synthase-like Acyl-CoA acyltransferase domain	-0.481139	0.00213993	0.0189805	0.257198	0.00311489	0.0418438	-0.137036	0.168907	0.490214	-2.5621	7.13519e-07	7.84222e-05	0.491791	1.01533e-13	3.23625e-12	-0.00865273	0.931542	1	-0.0905587	0.489768	1	-0.115375	0.377962	1	-0.0591301	0.456656	0.921	0.000540354	0.996495	1
BAL062_01982	ABUW_2121	BAL062_01982	permease,Sulfite exporter TauE/SafE	0.0215672	0.95255	1	-0.0479666	0.724381	0.958157	-0.214114	0.0754951	0.304307	3.28509	0.00263105	0.0994044	-0.0895708	0.511234	0.760937	-0.122425	0.378431	0.859849	-0.193828	0.18635	1	0.110201	0.407638	1	0.0119727	0.941918	1	-0.134005	0.294613	0.937206
BAL062_00642	ABUW_0643	cysI	sulfite reductase,Sulfite reductase [ferredoxin],ferredoxin-nitrite reductase,Sulfite reductase, beta subunit (hemoprotein),precorrin-3B synthase,Nitrite and sulphite reductase 4Fe-4S domain	-1.6208	1.67167e-28	1.55685e-26	0.112697	0.154234	0.611189	0.335653	0.000365689	0.00464478	-1.63405	0.0227737	0.298543	0.281977	1.35007e-05	0.000184423	0.166369	0.0724729	0.462259	-0.391492	0.000219101	0.0223671	-0.759754	5.86156e-12	6.52648e-10	-0.253065	0.000297899	0.00684975	0.172286	0.0801613	0.569498
BAL062_02830	ABUW_2895	cysN	ATP-sulfurylase, subunit 1,Sulfate adenylyltransferase subunit 1,bifunctional sulfate adenylyltransferase subunit 1/adenylylsulfate kinase protein,Adenylylsulfate kinase and related kinases,sulfate adenylyltransferase, large subunit,Elongation factor Tu GTP binding domain	1.84333	4.96849e-25	3.82249e-23	0.422523	4.25833e-08	1.31971e-06	0.445092	1.68508e-10	5.95003e-09	1.26932	0.0584936	0.474622	0.368963	7.17635e-11	1.77552e-09	0.380959	1.22455e-07	5.22278e-06	-0.256497	0.00520939	0.254975	-1.82149	3.15204e-26	1.40384e-23	0.165274	0.0213251	0.207658	0.231354	0.000680957	0.0173032
BAL062_02831	ABUW_2896	cysD	sulfate adenylyltransferase subunit 2,Sulfate adenylyltransferase subunit 2,sulfate adenylyltransferase subunit 2,PUA domain (predicted RNA-binding domain),sulfate adenylyltransferase, small subunit,Phosphoadenosine phosphosulfate reductase family	1.66718	7.16584e-15	2.34814e-13	0.500906	9.07817e-06	0.000205597	0.540448	1.18733e-07	2.9946e-06	-2.10065	0.330351	0.97572	0.232104	0.0180148	0.0879122	0.200142	0.105866	0.565802	-0.26516	0.0816946	1	-1.58818	4.57973e-25	1.81306e-22	0.259036	0.00991804	0.122605	0.27095	0.0122944	0.178698
BAL062_00720	ABUW_0722	cysH	phosphoadenosine phosphosulfate reductase,Phosphoadenosine phosphosulfate reductase,phosphoadenosine phosphosulfate reductase,Uncharacterized protein conserved in bacteria,5'-adenylylsulfate reductase, thioredoxin-independent,Phosphoadenosine phosphosulfate reductase family	1.27377	0.000219136	0.00249364	0.243893	0.210272	0.703494	0.421716	0.0269549	0.14965	-6.05795	0.0123673	0.208053	1.2477	9.8e-15	3.4e-13	0.438839	0.0259564	0.243728	-0.751449	0.00174033	0.126902	-1.71438	1.24e-11	1.23e-09	-0.753345	0.00130901	0.0233265	0.474803	0.0409279	0.403791
BAL062_00768	ABUW_0853	cysG	Multifunctional protein,Siroheme synthase,siroheme synthase,Uroporphyrinogen-III methylase,uroporphyrinogen-III C-methyltransferase,Tetrapyrrole (Corrin/Porphyrin) Methylases	-1.26554	1.22219e-17	4.97165e-16	0.116611	0.175051	0.652403	0.304747	0.00108311	0.0117675	-0.997449	0.159132	0.796573	0.214646	0.00054455	0.00505674	0.181872	0.0707889	0.455623	-0.498979	1.69499e-06	0.000356248	-0.699881	2.78296e-11	2.54249e-09	-0.264657	0.000628372	0.0127972	0.213189	0.0299994	0.329061
BAL062_02318	ABUW_2453	BAL062_02318	Acetyl-CoA carboxylase,Methylmalonyl-CoA carboxyltransferase 12S subunit,acetyl-CoA carboxylase carboxyltransferase subunit alpha,Acetyl-CoA carboxylase, carboxyltransferase component (subunits alpha and beta),methylmalonyl-CoA decarboxylase alpha subunit,Carboxyl transferase domain	2.80389	1.91352e-24	1.35439e-22	0.0210986	0.783099	0.974822	0.111749	0.127469	0.411797	-0.460001	0.701269	1	0.0513011	0.35478	0.631394	0.18096	0.00569648	0.0784652	0.0347283	0.714545	1	0.112961	0.197024	1	0.0636942	0.428523	0.909933	0.112877	0.160474	0.799655
BAL062_02319	ABUW_2454	mgh	3-methylglutaconyl-CoA hydratase,Probable enoyl-CoA hydratase echA8,enoyl-CoA hydratase,phenylacetate degradation probable enoyl-CoA hydratase PaaB,Enoyl-CoA hydratase/isomerase family	3.08643	5.0788e-41	8.55898e-39	-0.0573862	0.430123	0.874702	0.0572215	0.430891	0.77758	0.109896	0.907242	1	-0.0389823	0.550215	0.785894	0.0219485	0.759703	0.990112	0.0320657	0.728785	1	0.044599	0.656892	1	0.00417504	0.964182	1	0.118282	0.0954024	0.632198
BAL062_02320	ABUW_2455	accA1_2	Putative acyl-CoA carboxylase alpha chain protein,Acetyl-/propionyl-coenzyme A carboxylase alpha chain,pyruvate carboxylase,Acetyl/propionyl-CoA carboxylase, alpha subunit,urea carboxylase,Carbamoyl-phosphate synthase L chain, ATP binding domain	2.75875	1.14845e-28	1.12899e-26	0.0919926	0.218122	0.707344	0.133292	0.133636	0.423963	-0.255151	0.637592	1	0.0244223	0.686755	0.87835	0.091707	0.301919	0.81636	0.0905128	0.401707	1	0.107112	0.364105	1	0.0690348	0.307349	0.822983	0.111072	0.261909	0.915271
BAL062_02321	ABUW_2456	yngG	Putative Hydroxymethylglutaryl-CoA lyase,Hydroxymethylglutaryl-CoA lyase yngG,hydroxymethylglutaryl-CoA lyase,Isopropylmalate/homocitrate/citramalate synthases,isopropylmalate/citramalate/homocitrate synthases,HMGL-like	1.63583	4.21167e-14	1.28492e-12	-0.134009	0.10505	0.504449	-0.0925309	0.243534	0.595391	-0.302827	0.820517	1	-0.171997	0.0179316	0.087627	0.077947	0.342172	0.844981	-0.00166539	0.989278	1	-0.0164294	0.879597	1	-0.118643	0.174687	0.663029	0.0412832	0.603884	0.990582
BAL062_03678	ABUW_3642	BAL062_03678	putative periplasmic carboxyl-terminal protease,Probable CtpA-like serine protease,carboxy-terminal protease,C-terminal processing peptidase,Peptidase family S41	3.72213	1.55249e-21	8.86171e-20	-0.373265	0.602913	0.930984	0.467971	0.359345	0.717899	-3.21202	0.165011	0.796933	-1.02787	0.13577	0.360553	0.0546256	1	1	0.220635	0.754073	1	1.11293	0.0258048	0.349591	-0.185639	0.730005	0.983177	0.534097	0.30947	0.950799
BAL062_03329	ABUW_3293	ptsO	phosphocarrier protein (HPr-like) NPr, nitrogen related, exchanges phosphate with enzyme I,Phosphocarrier protein NPr,phosphocarrier protein Chr,Uncharacterized protein conserved in bacteria,phosphocarrier, HPr family,PTS HPr component phosphorylation site	1.27439	4.28876e-20	2.16235e-18	-0.193388	0.0305246	0.237541	-0.0522974	0.549097	0.839036	0.219337	0.905119	1	-0.110061	0.186006	0.43727	0.0312726	0.755591	0.990112	-0.0110556	0.931474	1	0.0590262	0.595642	1	-0.302631	0.00130512	0.0233265	-0.0100458	0.920911	1
BAL062_01686	ABUW_1793	ybgT	cyd operon protein YbgT,hypothetical protein,Predicted outer membrane lipoprotein,cyd operon protein YbgT,Membrane bound YbgT-like protein	-2.39036	3.54454e-08	6.70809e-07	0.137699	0.5553	0.916476	0.125796	0.567691	0.853055	-0.00137753	1	1	-0.238115	0.311113	0.584865	-0.270755	0.265394	0.776122	0.219562	0.39724	1	-0.234011	0.365681	1	-0.107492	0.678367	0.969576	-0.167055	0.503351	0.987691
BAL062_01687	ABUW_1794	cydB	cytochrome D ubiquinol oxidase subunit II,Cytochrome d ubiquinol oxidase subunit 2,cytochrome d ubiquinol oxidase subunit 2,cytochrome d ubiquinol oxidase, subunit II,Cytochrome oxidase subunit II	-2.45516	4.16122e-40	6.69388e-38	0.113931	0.339121	0.8189	0.0713628	0.470212	0.800914	1.95026	0.0335096	0.358523	0.358962	7.08015e-06	0.000104373	0.390253	7.01278e-06	0.000203486	0.00464614	0.968496	1	-0.125669	0.22622	1	0.141935	0.122045	0.579184	0.103412	0.19435	0.855964
BAL062_01688	ABUW_1795	cydA_1	cytochrome d terminal oxidase, polypeptide subunit I,Cytochrome d ubiquinol oxidase subunit 1,cytochrome d terminal oxidase subunit 1,Bacterial Cytochrome Ubiquinol Oxidase	-2.79969	3.0634e-55	9.85581e-53	-0.118322	0.180353	0.661668	-0.0420786	0.592863	0.865492	1.82022	0.0315904	0.346158	0.1081	0.175397	0.422721	0.0456758	0.606887	0.952164	-0.100312	0.388507	1	-0.0840844	0.417664	1	0.137312	0.134412	0.600024	0.120381	0.13797	0.74597
BAL062_01689	ABUW_1796	BAL062_01689	hypothetical protein	-2.01923	7.33295e-08	1.36586e-06	0.156281	0.535365	0.909348	0.0158758	0.95903	1	1.11128	0.655535	1	0.263714	0.149351	0.38207	-0.0107816	0.970027	1	-0.0155493	0.963704	1	0.259031	0.302241	1	0.345438	0.159035	0.63901	0.58967	0.00616903	0.108945
BAL062_03606	ABUW_3572	fadB	multifunctional fatty acid oxidation complex subunit alpha,Fatty acid oxidation complex subunit alpha,multifunctional fatty acid oxidation complex subunit alpha,Predicted nucleic-acid-binding protein containing a Zn-ribbon,fatty oxidation complex, alpha subunit FadB,3-hydroxyacyl-CoA dehydrogenase, NAD binding domain	-1.62789	1.22723e-26	1.05931e-24	-0.071757	0.3661	0.827236	0.279355	0.00461835	0.0384609	-0.466681	0.399988	1	0.0462264	0.481331	0.747235	0.12343	0.188467	0.70825	0.193826	0.0981955	1	0.0479897	0.69552	1	0.0818136	0.299745	0.81549	0.0462218	0.651019	0.993317
BAL062_03607	ABUW_3573	fadA_2	3-ketoacyl-CoA thiolase,3-ketoacyl-CoA thiolase,3-ketoacyl-CoA thiolase,Uncharacterized protein, possibly involved in aromatic compounds catabolism,acetyl-CoA C-acyltransferase FadA,Thiolase, N-terminal domain	-1.2617	3.60778e-19	1.59599e-17	-0.088151	0.255423	0.747646	0.111705	0.216056	0.55767	-1.18988	0.043423	0.412291	0.0516199	0.392897	0.66703	0.101135	0.26122	0.775882	0.0737211	0.500413	1	-0.0387888	0.738326	1	0.0525369	0.45942	0.921	0.0286959	0.770384	1
BAL062_02295	ABUW_2431	umuD_3	Component of DNA polymerase V,hypothetical protein,DNA polymerase V subunit UmuD,repressor LexA,Peptidase S24-like	-1.94077	1.23006e-13	3.62764e-12	0.19527	0.156051	0.613951	0.432884	0.000764812	0.00876802	-2.20407	0.287075	0.94445	0.136484	0.265771	0.534867	-0.193642	0.414654	0.884639	0.198893	0.297183	1	-0.0715863	0.657072	1	-0.182666	0.271	0.792131	0.0544611	0.726949	1
BAL062_03562	ABUW_3529	ubiB_4	ubiB,Probable ubiquinone biosynthesis protein UbiB,putative ubiquinone biosynthesis protein UbiB,2-polyprenylphenol 6-hydroxylase,ABC1 family	-2.04744	5.47688e-39	7.75307e-37	-0.00875454	0.911778	1	0.159066	0.0987481	0.359093	-2.74419	3.33782e-06	0.000327197	0.62555	6.7311e-21	3.26228e-19	0.043686	0.664625	0.968218	0.127711	0.299863	1	-0.157576	0.207975	1	0.178019	0.015786	0.164507	-0.248852	0.0209759	0.268431
BAL062_02057	ABUW_2192	ubiB_2	ABC-1 domain-containing protein,Aminoglycoside acetyltransferase regulator,putative ubiquinone biosynthesis protein UbiB,2-polyprenylphenol 6-hydroxylase,ABC1 family	-1.77397	5.07258e-13	1.44773e-11	-0.141775	0.340933	0.8189	-0.445304	0.000432423	0.00537635	-2.8201	0.157543	0.792524	0.548665	7.58162e-07	1.33452e-05	0.431297	2.22766e-05	0.000601978	-0.13128	0.385863	1	-1.69663	4.49878e-28	2.28988e-25	-0.198005	0.191238	0.689262	0.293067	0.0439207	0.421445
BAL062_03653	ABUW_3618	BAL062_03653	Fe-S cluster protector protein,Probable Fe(2+)-trafficking protein,oxidative damage protection protein,Fe-S cluster protector protein,Bacterial Fe(2+) trafficking	-1.61907	4.2103e-07	7.19819e-06	-0.0269849	0.859714	0.993462	0.423313	0.000687369	0.0079317	0.321312	0.883289	1	0.265725	0.0331266	0.140362	0.187263	0.363597	0.858304	-0.0280245	0.886285	1	0.00733315	0.975006	1	0.234171	0.0575033	0.386682	0.0339756	0.807446	1
BAL062_03886	ABUW_3846	dsbA	thiol:disulfide interchange protein DsbA,Thiol:disulfide interchange protein DsbA precursor,periplasmic protein disulfide isomerase I,Uncharacterized protein conserved in bacteria,DSBA-like thioredoxin domain	-0.855613	0.000724944	0.00728347	-0.969548	1.04471e-18	9.00232e-17	-1.09057	1.12553e-17	8.27967e-16	-4.49685	0.0349496	0.365309	-2.59429	7.21656e-121	2.83691e-118	-0.981547	3.18678e-23	4.90487e-21	0.0323408	0.798298	1	0.276073	0.0069001	0.131858	0.315701	0.000765685	0.0151606	-0.0682393	0.61084	0.990582
BAL062_00110	ABUW_0115	dsbB	disulfide bond formation protein B,Disulfide oxidoreductase,disulfide bond formation protein B,Disulfide bond formation protein DsbB	-0.767351	0.0113819	0.082373	-0.834117	4.53086e-10	1.88324e-08	-1.42694	3.1984e-27	3.89433e-25	-4.88036	0.0240898	0.298543	-2.29258	2.76308e-47	2.79308e-45	-1.02206	2.29003e-15	2.02668e-13	-0.178708	0.325744	1	0.312344	0.011294	0.191621	-0.0228518	0.83656	1	-0.263102	0.0252661	0.298074
BAL062_03671	ABUW_3635	dsbC_2	dsbC,Thiol:disulfide interchange protein DsbC precursor,protein disulfide isomerase II DsbC,Protein-disulfide isomerase,Disulfide bond isomerase protein N-terminus	0.433945	0.00500136	0.0406893	-0.336046	0.00017179	0.0031944	-0.70454	2.15509e-13	1.07172e-11	0.54762	0.405378	1	-0.181207	0.00449789	0.0299291	-0.528068	5.58452e-08	2.50243e-06	-0.155793	0.224555	1	-0.436533	0.000150401	0.00491633	-0.409408	1.15972e-05	0.000430544	-0.590515	1.04696e-08	8.80444e-07
																6.03893			2.22217
																4.89931			2.69497

## Sheet: Hypothetical
Hypothetical
BAL062	AB5070
locus_tag	locus_tag	gene_name	function	logFC_AgNO3	PValue	q.value	logFC_BZK	PValue	q.value	logFC_CTAB	PValue	q.value	logFC_CHL	PValue	q.value	logFC_TRC	PValue	q.value	logFC_CRL	PValue	q.value	logFC_PVPi	PValue	q.value	logFC_HClO	PValue	q.value	logFC_GLU	PValue	q.value	logFC_EtOH	PValue	q.value
BAL062_00514	ABUW_0523	BAL062_00514	SH3 domain protein	-2.51134	2.20197e-17	8.75591e-16	0.0959081	0.483385	0.898351	0.0399707	0.758781	0.946361	0.58845	0.574268	1	0.511658	9.19192e-11	2.2584e-09	-0.0686958	0.48658	0.913682	-0.0549072	0.723507	1	-0.994978	2.42682e-13	3.4587e-11	0.345255	0.00267327	0.0431111	-0.363328	0.000501022	0.0130118
BAL062_00515	ABUW_0524	yciI	YciI-like protein,hypothetical protein,YciI-like protein,YCII-related domain	-3.7392	5.14345e-10	1.21351e-08	-0.0987731	0.408246	0.857119	-0.0224619	0.893085	0.994781	-0.321317	0.873994	1	0.397535	0.00697821	0.043238	-0.0963796	0.614163	0.952164	-0.139534	0.372208	1	-0.882475	8e-12	8.38353e-10	0.139545	0.220592	0.738206	-0.301364	0.0133583	0.191795
BAL062_00643	ABUW_0644	BAL062_00643	oxidoreductase,Uncharacterized protein conserved in bacteria,Bacterial protein of unknown function (DUF934)	-1.65832	5.69328e-25	4.243e-23	0.210983	0.0219009	0.187629	0.374326	3.16506e-06	6.49758e-05	-0.604949	0.646691	1	0.227599	0.000994872	0.00858502	0.132626	0.136915	0.617635	-0.361204	0.00105144	0.0873675	-0.621685	1.27999e-08	8.7704e-07	-0.225488	0.0133538	0.150674	0.244381	0.00266225	0.0549888
BAL062_03382	ABUW_3368	engC	GTPase EngC,Putative ribosome biogenesis GTPase RsgA,GTPase RsgA,ribosome small subunit-dependent GTPase A,Protein of unknown function, DUF258	2.38534	8.07289e-10	1.84322e-08	0.13951	0.737705	0.963161	0.349919	0.278087	0.633909	0.970885	0.609668	1	0.142283	0.692823	0.879981	-0.222741	0.558415	0.936159	-0.22752	0.544179	1	0.19649	0.576634	1	-0.177662	0.581224	0.94908	1.15972	3.74597e-05	0.00133644
BAL062_00331	ABUW_0332	BAL062_00331	FAD/FMN-containing dehydrogenase,Uncharacterized FAD-linked oxidoreductase Rv2280,glycolate oxidase subunit GlcD,Fe-S oxidoreductase,glycolate oxidase, subunit GlcD,FAD linked oxidases, C-terminal domain	-2.2721	2.44732e-50	5.77404e-48	-0.146422	0.0562167	0.351226	-0.53295	7.50502e-14	4.01518e-12	1.7199	0.00193709	0.0799883	0.150181	0.0402599	0.162602	-0.0958136	0.248473	0.772106	-0.23243	0.0902927	1	-0.669668	3.70418e-14	6.94632e-12	-0.267791	7.44028e-05	0.00215107	-0.0281304	0.753075	1
BAL062_01043	ABUW_1139	BAL062_01043	hypothetical protein	1.31602	2.28209e-07	4.01808e-06	0.368514	0.00944124	0.105557	-0.509741	1.56774e-05	0.000278175	3.5952	6.88762e-09	1.24907e-06	0.873412	1.78373e-27	1.14743e-25	-0.0529164	0.6091	0.952164	0.187967	0.299887	1	-0.676209	9.77516e-07	4.90548e-05	-0.169541	0.123956	0.58419	-0.13246	0.358944	0.979099
BAL062_03141	ABUW_3113	yciO	putative translation factor,hypothetical protein,hypothetical protein,Putative translation factor (SUA5),Sua5/YciO/YrdC/YwlC family protein,yrdC domain	1.62538	1.6261e-25	1.27884e-23	0.0988478	0.261966	0.753405	0.106726	0.205292	0.542848	2.94774	0.000394701	0.0210527	-0.133139	0.143017	0.372647	0.177665	0.0511006	0.376792	0.131222	0.266405	1	0.0208032	0.840593	1	-0.185584	0.0379154	0.299519	-0.0553248	0.583325	0.990582
BAL062_01361	ABUW_1534	BAL062_01361	MJ0042 family finger-like domain,Protein of unknown function (DUF3426)	0.634573	0.0017456	0.0158038	0.443144	3.18462e-05	0.000650362	-0.0971377	0.303232	0.66711	2.5067	2.72554e-05	0.00224671	0.654953	2.86603e-15	1.05625e-13	-0.0154582	0.886457	1	0.185326	0.191797	1	-0.210178	0.068365	0.647429	0.116443	0.232707	0.754835	-0.00991409	0.928146	1
BAL062_00457	ABUW_0459	BAL062_00457	Protein of unknown function (DUF3108)	0.219932	0.130646	0.499843	-0.447594	3.14688e-08	1.00161e-06	-0.0414775	0.576032	0.857633	2.82346	5.61142e-07	6.46214e-05	-0.261853	4.1596e-05	0.000512775	-0.201651	0.0118413	0.141616	-0.0158962	0.877138	1	0.0898032	0.366433	1	-0.0237224	0.775318	0.999144	0.0613445	0.405041	0.987691
BAL062_00458	ABUW_0460	BAL062_00458	hypothetical protein	0.212663	0.490906	0.877306	0.113918	0.586665	0.93029	-0.994644	2.25606e-05	0.000382988	-6.03491	0.00861499	0.180616	0.607769	5.8948e-05	0.000699859	-1.32699	2.36272e-11	1.57812e-09	-0.421934	0.235228	1	-1.15949	2.933e-13	4.01934e-11	-0.0949962	0.48963	0.921	-0.150114	0.443148	0.987691
BAL062_00904	ABUW_0991	BAL062_00904	hypothetical protein	-0.314732	0.721369	0.951887	1.16736	0.0131734	0.13222	0.617682	0.22156	0.563638	3.80167	0.163702	0.796933	1.12154	0.00853333	0.0499023	0.385469	0.572297	0.939221	0.879655	0.0915595	1	1.72799	7.86614e-05	0.00269491	1.39955	0.001407	0.0247021	1.29326	0.00396641	0.0753191
BAL062_02227	ABUW_2363	BAL062_02227	hypothetical protein	0.15124	0.607655	0.9171	-1.17027	1.15384e-05	0.000259652	0.0473959	0.883532	0.991805	-5.35785	0.0342757	0.362443	-1.45192	4.25039e-09	9.45779e-08	-0.368372	0.146555	0.638134	0.424354	0.063501	0.939552	0.460059	0.0399294	0.460416	-0.00733711	1	1	0.0945667	0.71937	1
BAL062_00718	ABUW_0720	BAL062_00718	hypothetical protein	0.7554	0.000273137	0.00306867	0.041558	0.82655	0.985556	0.831579	9.36e-07	2.08e-05	-5.04239	0.0205806	0.284907	-0.122499	0.459049	0.727864	-1.17153	1.44659e-08	7.31561e-07	-0.193094	0.322768	1	0.177972	0.339382	1	-0.081652	0.647494	0.966338	0.0719247	0.741465	1
BAL062_02664	ABUW_2858	BAL062_02664	conserved hypothetical protein	-0.636004	0.0905366	0.401445	-0.0148843	0.964211	1	0.0955758	0.681339	0.911717	-4.73861	0.0294849	0.334548	-0.0963932	0.610642	0.829666	-1.09254	2.56674e-05	0.000673056	-0.127394	0.675951	1	-0.283173	0.293568	1	-0.580607	0.0763754	0.448438	-0.349639	0.133628	0.740931
BAL062_03748	ABUW_3720	BAL062_03748	Protein of unknown function (DUF2946)	-0.463429	0.0318094	0.191127	-0.708937	5.313e-05	0.0010605	-0.497582	0.00118128	0.0125599	-5.74389	0.0117237	0.206416	0.853322	6.53299e-20	2.9633e-18	-1.00459	1.2336e-17	1.32332e-15	-0.409815	0.0618786	0.939552	-1.20492	6.75e-13	8.59e-11	-0.476508	0.014399	0.157054	-1.0384	3.34e-08	2.46e-06
BAL062_01106	ABUW_1191	BAL062_01106	integral membrane protein,Uncharacterized integral membrane protein,Protein of unknown function (DUF817)	-1.85411	1.42795e-22	9.02414e-21	-0.216218	0.132486	0.57087	2.20352	2.95346e-07	7.19218e-06	2.19777	0.000173229	0.0108328	0.576472	0.00725755	0.0445054	1.0062	0.0272647	0.253326	1.1785	0.000226367	0.0224669	2.00464	0.000284632	0.00866789	0.760216	2.74517e-08	1.74711e-06	0.201032	0.532391	0.990582
BAL062_00300	ABUW_0302	BAL062_00300	beta-propeller domain-containing protein,Domain of unknown function (DUF477)	-2.74752	5.8559e-54	1.727e-51	0.0667824	0.356675	0.823079	0.0429803	0.618088	0.880642	0.225737	0.712352	1	0.0421117	0.48973	0.752252	0.0639783	0.459213	0.906129	0.0405678	0.701899	1	0.029248	0.786843	1	0.0619587	0.373515	0.874753	0.0952167	0.301342	0.940634
BAL062_00301	ABUW_0303	BAL062_00301	Domain of unknown function (DUF477)	-2.07763	1.80777e-42	3.19885e-40	-0.105708	0.113464	0.52488	-0.111544	0.117064	0.395933	-0.164592	0.821255	1	-0.00921245	0.868388	0.966973	-0.0343355	0.632052	0.954957	-0.101551	0.260066	1	-0.0658313	0.455935	1	-0.0389398	0.57699	0.94863	-0.0872483	0.340537	0.975382
BAL062_00032	ABUW_0036	BAL062_00032	hypothetical protein	-2.19581	1.27762e-20	7.06481e-19	-0.0872621	0.414195	0.863333	-0.12907	0.104222	0.369117	1.57894	0.0254222	0.30015	0.259018	8.18542e-05	0.000934194	-0.0227472	0.772632	0.990818	0.282783	0.00748355	0.338465	-0.386666	0.00019841	0.00620117	0.27537	0.000320109	0.00725534	-0.0266926	0.727111	1
BAL062_02155	ABUW_2290	BAL062_02155	hypothetical protein	-3.37382	5.37885e-10	1.25235e-08	-0.776003	0.0196037	0.176405	-0.295639	0.354677	0.715228	-4.42858	0.0759602	0.554289	-0.224758	0.640181	0.847665	0.262428	0.564644	0.937982	0.385413	0.218881	1	0.202495	0.522381	1	0.156754	0.626762	0.961047	0.459621	0.123217	0.72481
BAL062_01770	ABUW_1879	BAL062_01770	signal peptide,conserved hypothetical protein,Bacterial protein of unknown function (Gcw_chp)	2.59952	2.67473e-49	5.91616e-47	0.188804	0.00774717	0.0906317	0.0887737	0.210836	0.550068	1.1021	0.228291	0.887681	-0.0177623	0.796072	0.932975	0.0944814	0.246547	0.772106	0.00770341	0.940192	1	0.0598491	0.553593	1	0.0582261	0.454486	0.921	0.136963	0.0691558	0.536731
BAL062_03561	ABUW_3528	BAL062_03561	Uncharacterized protein conserved in bacteria	-1.48284	9.80764e-14	2.94146e-12	-0.114008	0.214037	0.707344	0.221196	0.010814	0.0735728	-0.832968	0.624317	1	0.498484	4.03311e-11	1.03094e-09	-0.156173	0.136818	0.617635	0.155703	0.18436	1	-0.0490545	0.62715	1	0.146187	0.0977441	0.517622	0.00992403	0.915368	1
BAL062_02826	ABUW_2890	ytfL	hemolysin,hypothetical protein,hypothetical protein,Putative Mg2+ and Co2+ transporter CorB,gliding motility-associated protein GldE,Domain of unknown function DUF21	1.67894	1.49381e-26	1.25872e-24	0.136693	0.150221	0.606375	0.058258	0.543084	0.835119	1.5458	0.201834	0.856519	0.0449154	0.633217	0.843508	0.043555	0.67871	0.970146	0.134785	0.258087	1	0.151646	0.135491	0.885788	0.150691	0.1001	0.524643	0.0185456	0.852961	1
BAL062_00137	ABUW_0144	BAL062_00137	putative conserved small protein,Uncharacterized conserved small protein,Domain of unknown function (DUF1737)	-0.181607	0.491772	0.877306	0.0276292	0.861374	0.993462	-0.0752496	0.559495	0.847558	-8.40716	0.00196277	0.0799883	0.0548382	0.687295	0.87835	-0.0234611	0.902351	1	-0.0233578	0.895193	1	0.00651465	0.97796	1	-0.0801304	0.573914	0.946958	-0.138348	0.371454	0.983489
BAL062_01601		BAL062_01601	ThiS family protein,ThiS family	0.303117	0.130119	0.499545	0.102599	0.334111	0.8189	0.123684	0.229532	0.573746	3.97903	1.65439e-05	0.00144308	-0.127758	0.217764	0.482296	-0.134069	0.245913	0.772106	-0.0891673	0.492088	1	-0.0262186	0.827111	1	-0.0586538	0.601038	0.955805	0.088167	0.47355	0.987691
BAL062_00024	ABUW_0027	BAL062_00024	hypothetical protein	0.489852	0.0020602	0.0184117	0.182012	0.0192583	0.17536	0.242232	0.0121538	0.0803652	1.99594	7.46274e-05	0.00510705	0.143175	0.0253055	0.115375	-0.0357818	0.701439	0.970237	0.123321	0.304994	1	0.0885059	0.469763	1	0.0733081	0.30888	0.825224	-0.10795	0.288551	0.935868
BAL062_03408	ABUW_3375	BAL062_03408	hypothetical protein,Uncharacterized protein conserved in bacteria,putative PEP-CTERM system TPR-repeat lipoprotein,Uncharacterized protein conserved in bacteria (DUF2133)	0.911907	7.01954e-07	1.1663e-05	-1.08695	1.06363e-11	5.14769e-10	-1.77313	2.69441e-28	3.39784e-26	-0.67922	0.613809	1	-2.12336	1.34255e-127	6.78564e-125	-1.16852	8.56079e-40	4.32932e-37	-0.300425	0.207125	1	-0.0796759	0.580856	1	-0.733182	5.79306e-10	4.69238e-08	0.0386748	0.820313	1
BAL062_00203	ABUW_0208	BAL062_00203	putative NAD/FAD-binding protein,hypothetical protein,Monoamine oxidase,squalene-associated FAD-dependent desaturase,Flavin containing amine oxidoreductase	-0.758022	0.000697663	0.00709491	0	0.0759683	0.424677	-1.0803	7.7138e-06	0.000144113	0	0.00363373	0.118942	0.463049	6.91383e-12	1.86726e-10	-0.856915	1.26562e-11	8.78489e-10	-0.516589	0.000880728	0.0749248	-1.09903	5.895e-15	1.31274e-12	-0.913121	3.64769e-14	4.64298e-12	-0.50309	8.51751e-05	0.00286513

## Sheet: Post transcription
Post transcription
BAL062	AB5075
locus_tag	locus_tag	gene_name	function	logFC_AgNO3	PValue	q.value	logFC_BZK	PValue	q.value	logFC_CTAB	PValue	q.value	logFC_CHL	PValue	q.value	logFC_TRC	PValue	q.value	logFC_CRL	PValue	q.value	logFC_PVPi	PValue	q.value	logFC_HClO	PValue	q.value	logFC_GLU	PValue	q.value	logFC_EtOH	PValue	q.value
BAL062_03881	ABUW_3841	rph	ribonuclease PH,Ribonuclease PH,ribonuclease PH,Xanthosine triphosphate pyrophosphatase,ribonuclease PH,3' exoribonuclease family, domain 1	0.0808879	0.652265	0.930714	-0.55779	7.67e-12	3.76363e-10	-0.729132	9.67199e-20	8.75687e-18	-0.200715	0.862875	1	-1.6646	2.75989e-89	6.10281e-87	-0.359496	2.42e-05	0.00064412	-0.206337	0.0368311	0.836984	-0.038112	0.812334	1	-0.439895	2.69122e-07	1.47561e-05	-0.173639	0.0463497	0.431464
BAL062_00464	ABUW_0466	BAL062_00464	ribonuclease I,Ribonuclease I,Ribonuclease T2 family	0.370569	0.0900149	0.400204	-1.54092	8.6504e-34	2.03746e-31	-1.96883	5.75983e-72	3.38966e-69	-0.744866	0.626984	1	-1.46364	1.90037e-55	2.49019e-53	-1.11902	4.0179e-28	7.90186e-26	-0.332749	0.0586487	0.939552	-0.432881	0.0253371	0.344566	-1.09949	1.19909e-24	1.06839e-21	-0.765547	1.17416e-05	0.000505749
BAL062_02638	ABUW_2826	rnt	Ribonuclease T,Ribonuclease T,ribonuclease T,ribonuclease T,Exonuclease	-0.0384023	0.925544	1	-0.656103	0.000421108	0.00722221	-0.999693	8.89731e-08	2.26017e-06	-0.687896	0.733165	1	-1.20067	3.21355e-07	5.86058e-06	-0.00642298	1	1	-0.310586	0.115914	1	-0.160402	0.524805	1	-0.492731	0.00519628	0.0740781	-0.0470502	0.833335	1
BAL062_00717	ABUW_0719	cafA	ribonuclease G, endoribonuclease G (cytoplasmic axial filament protein ),Ribonuclease G,ribonuclease G,Ribonucleases G and E,ribonuclease, Rne/Rng family,Ribonuclease E/G family	-1.36164	0.000166129	0.00192764	-0.199248	0.288299	0.775081	-0.660069	0.000139328	0.00198374	-4.0945	0.047334	0.427702	-1.13368	4.40327e-11	1.11277e-09	-0.972412	1.72411e-06	5.81273e-05	-0.213396	0.361099	1	-0.503519	0.0133605	0.217404	-0.0564325	0.784488	1	-0.661865	0.000234119	0.00683397
BAL062_02007	ABUW_2146	rnd	Ribonuclease D, processes tRNA,Ribonuclease D,ribonuclease D,Ribonuclease D,ribonuclease D,3'-5' exonuclease	-1.03371	0.00088865	0.00866372	-0.790686	2.56939e-10	1.10703e-08	-1.51075	3.67649e-35	6.83246e-33	0.175299	0.93132	1	-1.34231	5.34513e-30	3.78221e-28	-0.690705	4.21457e-08	1.98928e-06	-0.25151	0.0463581	0.894612	-0.179431	0.33409	1	-0.671974	3.28387e-10	2.72179e-08	0.0118823	0.924849	1
BAL062_02062	ABUW_2197	ppiD	peptidyl-prolyl cis-trans isomerase,Peptidyl-prolyl cis-trans isomerase D,periplasmic folding chaperone,nitrogen fixation protein NifM,PPIC-type PPIASE domain	0.290912	0.138051	0.504918	-0.721306	5.80087e-05	0.00114494	-1.72682	9.12255e-30	1.34216e-27	-0.099841	0.953008	1	-2.23368	9.30649e-65	1.37193e-62	-1.03512	5.0838e-18	5.80537e-16	-0.268535	0.336708	1	-0.14836	0.327789	1	-0.720295	6.92741e-07	3.52704e-05	-0.0802408	0.627373	0.992569
BAL062_02833	ABUW_2898	BAL062_02833	putative signal peptide-containing protein	0.022661	0.908443	1	-0.650595	2.23498e-09	8.4002e-08	-0.189193	0.0785548	0.314353	2.24136	0.000238418	0.0145488	-1.5427	2.48571e-127	1.09931e-124	-0.0837564	0.53586	0.925338	0.00962055	0.961599	1	-0.118394	0.325106	1	0.185516	0.110719	0.557347	0.0649574	0.659797	0.993317
BAL062_03674	ABUW_3638	pbpG	D-alanyl-D-alanine endopeptidase,D-alanyl-D-alanine endopeptidase precursor,D-alanyl-D-alanine endopeptidase,D-alanyl-D-alanine carboxypeptidase	-1.83643	1.76303e-07	3.15119e-06	-1.01538	0.0406754	0.286267	0.86522	0.0131898	0.0861547	-2.96345	0.212165	0.866702	-1.70841	0.000394529	0.00382423	-0.678307	0.0969643	0.546582	0.288089	0.541504	1	0.0379709	1	1	0.656209	0.0646551	0.410505	0.0173707	1	1
BAL062_03435	ABUW_3402	tig	trigger factor,Trigger factor,trigger factor,FKBP-type peptidyl-prolyl cis-trans isomerase (trigger factor),trigger factor,Bacterial trigger factor protein (TF)	1.03182	2.45308e-15	8.51124e-14	-0.571189	2.43958e-12	1.26751e-10	-1.15929	1.60377e-18	1.25843e-16	-1.58221	0.083903	0.580536	-1.50984	3.4889e-105	9.49517e-103	-0.58298	1.5367e-16	1.43155e-14	-0.176998	0.291753	1	-0.351069	0.00136114	0.0336436	-0.176902	0.0290291	0.251115	0.116888	0.19574	0.857877
BAL062_03418	ABUW_3385	prc	Carboxy-terminal protease for penicillin-binding protein,Tail-specific protease precursor,carboxy-terminal protease,C-terminal processing peptidase,Peptidase family S41	3.12743	8.1433e-68	5.76383e-65	0.0884023	0.232722	0.724688	1.0656	4.17228e-49	1.22769e-46	1.35872	0.0418886	0.408414	-1.37606	1.40523e-68	2.61668e-66	-0.0265712	0.870864	1	0.483677	3.05776e-06	0.000546269	0.827169	9.44157e-17	2.58772e-14	0.181594	0.0386634	0.301524	0.560724	7.96985e-16	1.22389e-13
BAL062_03272	ABUW_3234	BAL062_03272	peptidase C13 family protein,Peptidase C13 family	2.80036	3.13275e-51	7.91914e-49	-0.341713	0.000316961	0.00565566	0.353784	4.19393e-07	9.80713e-06	2.41595	2.06768e-05	0.00174407	-1.35782	3.16727e-52	3.73526e-50	-0.152432	0.109226	0.567071	0.038804	0.725901	1	0.451494	5.23333e-07	2.82521e-05	-0.496083	7.75239e-05	0.00221036	0.281688	0.00949404	0.150372
BAL062_03118	ABUW_3090	BAL062_03118	signal peptide,tetratricopeptide repeat protein,Uncharacterized enzyme of heme biosynthesis,putative PEP-CTERM system TPR-repeat lipoprotein,Tetratricopeptide repeat	3.46852	6.16213e-20	2.98737e-18	0.0151807	0.959637	1	0.945893	7.40788e-07	1.66606e-05	-1.98287	0.293528	0.95141	-1.2681	5.78361e-06	8.63393e-05	-0.314335	0.202519	0.73063	0.537868	0.0540564	0.911054	1.08148	0.00407627	0.0869686	-0.730308	0.00307808	0.0481152	-0.0928853	0.6808	1
BAL062_02018	ABUW_2158	BAL062_02018	signal peptide	-0.288514	0.457998	0.85805	1.13526	0.000115684	0.00218563	0.154561	0.671655	0.905947	-7.50409	0.0169063	0.250282	0.457297	0.211776	0.478253	0.404979	0.256758	0.773778	0.502511	0.122054	1	0.921179	0.00366815	0.0787327	0.79596	0.00925419	0.117793	0.887648	0.00221813	0.048064
BAL062_00805	ABUW_0892	greA	transcription elongation factor GreA,Transcript cleavage factor greA,transcription elongation factor GreA,Transcription elongation factor,transcription elongation factor GreA,domain	0.362435	0.290777	0.722653	-0.78028	1.29178e-06	3.33129e-05	-1.65008	2.39568e-19	2.11479e-17	0.824555	0.738913	1	-1.24065	5.56603e-11	1.3868e-09	-0.955306	2.16671e-09	1.18002e-07	-0.311389	0.167287	1	-0.189915	0.32742	1	-0.606153	6.22499e-05	0.00184882	0.116179	0.468166	0.987691
BAL062_00901	ABUW_0988	sigX	RNA polymerase factor sigma-70,RNA polymerase sigma factor sigX,RNA polymerase factor sigma-70,RNA polymerase sigma factor, sigma-70 family,Sigma-70, region 4	-0.334479	0.363734	0.786531	-1.36857	1.24298e-17	8.96218e-16	-0.731616	1.27578e-06	2.79799e-05	-2.56723	0.214956	0.874042	-1.62409	8.78913e-12	2.35575e-10	-2.20964	3.78264e-21	5.1502e-19	-0.140155	0.442485	1	-1.08181	1.09566e-05	0.000459274	-0.231436	0.0864883	0.486958	-1.11396	5.87203e-12	6.91333e-10
BAL062_01364	ABUW_1537	gidA	tRNA uridine 5-carboxymethylaminomethyl modification enzyme GidA,Glucose-inhibited division protein A,tRNA uridine 5-carboxymethylaminomethyl modification enzyme GidA,Proteins involved in synaptic transmission and general secretion, Sec1 family,tRNA uridine 5-carboxymethylaminomethyl modification enzyme GidA,Glucose inhibited division protein A	-0.469558	0.211378	0.630747	-1.6204	1.10452e-06	2.91215e-05	-1.3389	2.57256e-05	0.000428476	-1.02602	0.600423	1	-0.759326	0.00376136	0.0257402	-1.19271	6.01798e-05	0.00148977	-1.26117	0.000181548	0.0196567	-1.19773	0.000299453	0.00904196	-1.26616	7.48407e-05	0.00215107	-1.50241	4.5314e-06	0.000219245
BAL062_03291	ABUW_3253	rpoN	RNA polymerase factor sigma-54,RNA polymerase factor sigma-54,DNA-directed RNA polymerase specialized sigma subunit, sigma54 homolog,RNA polymerase sigma-54 factor,Sigma-54, DNA binding domain	1.42726	7.79799e-16	2.81603e-14	0.378807	8.46399e-06	0.000195446	0.436909	1.4987e-06	3.26661e-05	1.07269	0.392959	1	0.720783	2.35221e-21	1.15585e-19	1.05045	4.04528e-17	3.97786e-15	0.657849	3.77155e-09	2.24596e-06	0.791326	8.87951e-14	1.43808e-11	0.262323	0.00230331	0.0376559	0.785956	5.765e-15	8.14479e-13
BAL062_01281	ABUW_1375	rpoH	RNA polymerase factor sigma-32,Heat shock regulatory protein F33.4,RNA polymerase factor sigma-32,alternative sigma factor RpoH,Sigma-70 region 2	-1.04426	3.09858e-06	4.72667e-05	0.901047	7.7376e-16	4.88159e-14	1.76403	5.29765e-47	1.43892e-44	3.5055	0.00211583	0.0852679	0.765162	0.00210397	0.0158717	0.809894	0.0275869	0.254317	0.942549	7.01816e-14	2.50759e-10	0.412548	0.000682513	0.0187061	1.13789	1.09585e-16	2.16978e-14	0.180866	0.423412	0.987691
BAL062_00299	ABUW_0301	BAL062_00299	signal peptide,LemA family	-2.47291	5.13161e-20	2.52233e-18	0.043691	0.619567	0.93544	-0.0125337	0.865933	0.991378	-0.840483	0.518288	1	0.235087	0.000807088	0.00712089	0.0119206	0.88348	1	0.0119397	0.904057	1	0.00786051	0.943036	1	-0.0821307	0.324966	0.838179	-0.040996	0.598896	0.990582
BAL062_02133	ABUW_2268	surA	peptidyl-prolyl cis-trans isomerase,Peptidyl-prolyl cis-trans isomerase surA,peptidyl-prolyl cis-trans isomerase SurA,nitrogen fixation protein NifM,PPIC-type PPIASE domain	0.978766	1.47893e-11	3.96511e-10	0.278945	3.35812e-05	0.000681853	0.14564	0.0420112	0.199406	-5.92314	2.50645e-06	0.000252525	0.17577	0.00129185	0.010459	-0.00613824	0.932601	1	0.0409727	0.65196	1	0.184891	0.0453773	0.506831	0.132998	0.0661146	0.417788	0.0103999	0.901046	1
BAL062_00127	ABUW_0134	BAL062_00127	Ankyrin repeats (3 copies)	0.201683	0.130036	0.499545	0.0714139	0.318553	0.809674	0.0741126	0.373467	0.730059	3.61791	4.74582e-09	9.05952e-07	-0.17429	0.0153524	0.0782661	-0.0588595	0.487787	0.913682	0.0150538	0.897422	1	-0.0640511	0.558464	1	0.0502034	0.529083	0.934218	0.0344597	0.657914	0.993317
BAL062_00128	ABUW_0135	BAL062_00128	signal peptide protein	0.078556	0.594798	0.914595	0.69347	1.00446e-10	4.49212e-09	0.755874	3.08035e-07	7.44981e-06	5.46593	4.17644e-18	7.57397e-15	-1.44007	4.36125e-56	6.17204e-54	-0.82139	5.98342e-23	8.82555e-21	0.247104	0.123887	1	0.186208	0.0889211	0.721863	0.290446	0.03692	0.293058	0.173162	0.168394	0.8215
BAL062_03663	ABUW_3627	dksA	DnaK suppressor protein,DnaK suppressor protein,RNA polymerase-binding transcription factor,DnaK suppressor protein,RNA polymerase-binding protein DksA,Prokaryotic dksA/traR C4-type zinc finger	-2.30231	1.7942e-08	3.4509e-07	0.713743	0.00382346	0.0487664	1.15097	2.50499e-10	8.58749e-09	-4.68001	0.050884	0.440468	-0.245774	0.303144	0.577869	-0.412392	0.118324	0.58644	0.651168	0.0138509	0.487542	-0.537116	0.0270027	0.361694	-0.191264	0.430033	0.910302	0.35606	0.148762	0.776977
BAL062_03338	ABUW_3302	relA	relA,GTP pyrophosphokinase,(p)ppGpp synthetase I/GTP pyrophosphokinase,Guanosine polyphosphate pyrophosphohydrolases/synthetases,RelA/SpoT family protein,Region found in RelA / SpoT proteins	-1.33646	1.18328e-21	6.86494e-20	-0.0862594	0.341876	0.8189	0.0863062	0.369693	0.72879	-4.73712	1.30903e-06	0.000135653	0.199099	0.0236574	0.109555	0.503229	4.40269e-05	0.00112126	0.67484	1.88627e-06	0.000374425	0.0584764	0.638344	1	-0.0560326	0.479196	0.921	0.679844	3.96378e-10	3.68423e-08
BAL062_03678	ABUW_3642	BAL062_03678	putative periplasmic carboxyl-terminal protease,Probable CtpA-like serine protease,carboxy-terminal protease,C-terminal processing peptidase,Peptidase family S41	3.72213	1.55249e-21	8.86171e-20	-0.373265	0.602913	0.930984	0.467971	0.359345	0.717899	-3.21202	0.165011	0.796933	-1.02787	0.13577	0.360553	0.0546256	1	1	0.220635	0.754073	1	1.11293	0.0258048	0.349591	-0.185639	0.730005	0.983177	0.534097	0.30947	0.950799

## Sheet: Transporters
Transporters
BAL062	AB5075
locus_tag	locus_tag	gene_name	function	logFC_AgNO3	PValue	q.value	logFC_BZK	PValue	q.value	logFC_CTAB	PValue	q.value	logFC_CHL	PValue	q.value	logFC_TRC	PValue	q.value	logFC_CRL	PValue	q.value	logFC_PVPi	PValue	q.value	logFC_HClO	PValue	q.value	logFC_GLU	PValue	q.value	logFC_EtOH	PValue	q.value
BAL062_01895	ABUW_1972	adeS	AdeS,Signal transduction histidine-protein kinase BaeS,signal transduction histidine-protein kinase BaeS,Signal transduction histidine kinase involved in nitrogen fixation and metabolism regulation,heavy metal sensor kinase,Histidine kinase-, DNA gyrase B-, and HSP90-like ATPase	0	0.691801	0.939633	-2.91262	6.89994e-26	1.16083e-23	-0.0912936	0.557476	0.845727	-7.90796	0.00294697	0.105828	-0.0683981	0.662766	0.863427	-0.121924	0.495694	0.913682	-0.304621	0.0757397	0.991274	0.0732889	0.675265	1	-0.13667	0.409591	0.908091	0.0928302	0.576044	0.990582
BAL062_01896	ABUW_1973	adeR	AdeR,Staphylococcal respiratory response protein A,DNA-binding response regulator CreB,Response regulator of citrate/malate metabolism,phosphate regulon transcriptional regulatory protein PhoB,Response regulator receiver domain	0	0.957097	1	-2.92241	5.00935e-10	2.05791e-08	0.30088	0.0288537	0.156983	-4.74188	0.0251538	0.299132	0.389363	0.00831058	0.0493336	0.410029	0.0161551	0.178716	0.359354	0.0434863	0.875628	0.111758	0.50948	1	0.142524	0.325439	0.838179	0.374072	0.0127698	0.184094
BAL062_01897	ABUW_1974	adeA	membrane fusion protein,Multidrug resistance protein mexA precursor,multidrug efflux system transporter AcrA,efflux transporter, RND family, MFP subunit,HlyD family secretion protein	0	0.120348	0.478014	-3.28039	2.99253e-37	1.05726e-34	-0.137016	0.114222	0.390948	-6.30206	5.84e-10	1.77e-07	0.0158012	0.792751	0.93256	0.0913752	0.280866	0.798039	-0.00379674	0.972512	1	0.100546	0.36333	1	-0.00800302	0.908773	1	0.121986	0.191923	0.853742
BAL062_01898	ABUW_1975	acrB	AdeB,Acriflavine resistance protein B,multidrug efflux protein,RND transporter, hydrophobe/amphiphile efflux-1 (HAE1) family,AcrB/AcrD/AcrF family	0	0.528805	0.887869	-6.85079	0	0	-1.15702	1.68e-08	4.71e-07	-6.42397	5.57e-12	2.24e-09	-2.98864	2.3056e-203	1.63144e-200	-1.01654	2.58256e-33	8.31114e-31	-0.0246742	0.839908	1	-0.120996	0.287066	1	-0.0176875	0.797274	1	0.267835	0.00724008	0.122942
BAL062_01899	ABUW_1976	adeC	outer membrane protein,Outer membrane protein oprM precursor,copper/silver efflux system outer membrane protein CusC,efflux transporter, outer membrane factor (OMF) lipoprotein, NodT family,Outer membrane efflux protein	0	0.736492	0.959179	-1.31614	9.21806e-35	2.50519e-32	-0.0836788	0.256157	0.609907	-3.48081	0.0590187	0.477815	-0.24387	0.000642966	0.0058031	-0.0569097	0.437213	0.893056	-0.116848	0.228521	1	0.0346027	0.733414	1	-0.146576	0.0709931	0.431556	0.0716275	0.348239	0.975382
BAL062_00757	ABUW_0842	adeK	outer membrane protein,Outer membrane protein oprM precursor,copper/silver efflux system outer membrane protein CusC,efflux transporter, outer membrane factor (OMF) lipoprotein, NodT family,Outer membrane efflux protein	-0.805729	9.58e-09	1.95e-07	-4.05617	5.09911e-43	2.25189e-40	-0.0395555	0.666528	0.903692	-6.32332	7.5e-12	2.72e-09	-4.77024	0	0	-3.31901	1.35785e-307	4.80678e-304	0.0246924	0.819388	1	-0.111545	0.322386	1	-0.0858826	0.210523	0.721495	0.15615	0.112401	0.683584
BAL062_00758	ABUW_0843	adeJ	AdeJ,Multidrug-efflux transporter MexB,aminoglycoside/multidrug efflux system,RND transporter, hydrophobe/amphiphile efflux-1 (HAE1) family,AcrB/AcrD/AcrF family	-0.410025	0.00605419	0.0479324	-1.19955	7.68394e-34	1.9391e-31	-0.00203062	0.98404	1	-4.15556	1.46e-07	2.04e-05	-2.14369	2.65746e-235	2.35053e-232	-2.55015	4.34734e-127	7.6948e-124	0.0276658	0.812724	1	-0.117008	0.358753	1	-0.0524924	0.457401	0.921	0.0800018	0.445476	0.987691
BAL062_00759	ABUW_0844	adeI	multidrug efflux protein AdeI,Acriflavine resistance protein A precursor,multidrug efflux system transporter AcrA,efflux transporter, RND family, MFP subunit,HlyD family secretion protein	-0.372717	0.0172931	0.116794	-0.904585	8.93686e-26	1.43518e-23	0.00770436	0.937455	1	-2.29648	0.000245918	0.014622	-1.4079	1.56747e-110	4.62142e-108	-1.94916	8.12183e-106	9.58375e-103	0.0737731	0.529537	1	-0.267091	0.0355298	0.427678	-0.0891002	0.216066	0.731358	0.0379258	0.721679	1
BAL062_00029	ABUW_0033	acrR_1	Putative transcriptional regulator,Potential acrAB operon repressor,DNA-binding transcriptional repressor AcrR,pyrimidine utilization regulatory protein R,Bacterial regulatory proteins, tetR family	-0.276895	0.0482212	0.259979	-0.0301792	0.678572	0.952786	-0.024217	0.783418	0.9566	-0.927706	0.192842	0.843715	0.322224	1.75848e-07	3.34489e-06	-0.0320614	0.706132	0.970237	0.0310998	0.765859	1	-0.0868188	0.420835	1	-0.02523	0.715018	0.980125	-0.0883861	0.335065	0.969891
BAL062_00030	ABUW_0034	mdtA	Putative RND family drug transporter,Macrolide-specific efflux protein macA precursor,macrolide transporter subunit MacA,efflux transporter, RND family, MFP subunit,HlyD family secretion protein	0.615082	6.67e-05	0.000831646	0.00234171	0.976164	1	0.0429638	0.647977	0.895641	1.6771	0.000737422	0.0371476	-2.89035	1.51329e-293	1.78468e-290	-0.223152	0.0225724	0.225088	0.0585551	0.600294	1	0.0485846	0.696411	1	0.0790611	0.286763	0.802974	0.0466192	0.656592	0.993317
BAL062_00031	ABUW_0035	czcA_1	Acr family drug resistance transporter,Cation efflux system protein CzcA,multidrug efflux protein,heavy metal efflux pump, CzcA family,AcrB/AcrD/AcrF family	-0.59909	0.000139132	0.0016496	-0.0586791	0.448197	0.886607	0.0528971	0.5773	0.857633	1.39858	0.0047669	0.14529	-2.86998	0	0	-0.18564	0.0577186	0.404602	0.0223799	0.831913	1	-0.012208	0.919935	1	0.0784843	0.272426	0.792131	0.0319573	0.765404	1
BAL062_01495	ABUW_1678	BAL062_01495	transcriptional regulator,TetR family transcriptional regulator,transcriptional repressor BetI,Bacterial regulatory proteins, tetR family	2.375	3.43282e-44	6.39407e-42	0.314936	0.0498995	0.327078	0.220907	0.125622	0.410569	6.4043	8.95999e-16	6.49958e-13	-0.214104	0.15356	0.389739	-0.595717	0.000582468	0.0115839	0.0630643	0.724718	1	-0.169448	0.315259	1	0.479151	0.000474451	0.0101254	-0.167217	0.293915	0.937206
BAL062_01496	ABUW_1679	amvA	major facilitator superfamily permease,Methyl viologen resistance protein SmvA,methyl viologen resistance protein SmvA,Arabinose efflux permease,drug resistance MFS transporter, drug:H+ antiporter-2 (14 Spanner) (DHA2) family,Major Facilitator Superfamily	-4.28043	2.61914e-97	4.63457e-94	-0.638861	1.83021e-20	1.70161e-18	0.040293	0.579258	0.858673	-6.73125	1.08325e-06	0.000115558	-0.0839517	0.118036	0.334458	0.0696326	0.319049	0.825894	-0.018357	0.847485	1	0.0690099	0.460226	1	-0.0175509	0.808129	1	0.0905787	0.285582	0.933187
BAL062_01229	ABUW_1247	yadH	multidrug ABC transporter permease,Inner membrane transport permease yadH,inner membrane transport permease,ATP phosphoribosyltransferase,daunorubicin resistance ABC transporter membrane protein,ABC-2 type transporter	-1.13691	1.71372e-07	3.07861e-06	0.00867663	0.949627	1	-0.0656095	0.516674	0.816999	-2.38738	0.275604	0.93468	0.285094	0.00133646	0.0106977	0.196428	0.0552967	0.395455	-0.0831221	0.560001	1	-0.102231	0.403074	1	-0.0996897	0.326194	0.838179	-0.136691	0.205911	0.870002
BAL062_01230	ABUW_1248	yadG	putative transport protein (ABC superfamily, ATP-bind),Daunorubicin/doxorubicin resistance ATP-binding protein DrrA,nodulation ABC transporter NodI,ABC-type Na+ transport system, ATPase component,daunorubicin resistance ABC transporter, ATP-binding protein,ABC transporter	-1.37576	4.28858e-18	1.80682e-16	0.063637	0.460344	0.891682	-0.0165033	0.846404	0.986353	0.651335	0.518539	1	0.227752	0.000555808	0.00512096	0.158001	0.0450801	0.348436	0.0445058	0.658463	1	-0.0500268	0.648683	1	-0.0325075	0.710414	0.979092	0.0610621	0.471016	0.987691
BAL062_02542	ABUW_2706	hmrR_2	HTH-type transcriptional regulator,Copper export regulator,DNA-binding transcriptional regulator CueR,Transcriptional regulator, effector-binding domain/component,Cu(I)-responsive transcriptional regulator,MerR family regulatory protein	2.29664	2.4e-30	2.83e-28	0.176826	0.173565	0.65027	-0.0874849	0.465169	0.794644	0.0334451	0.987796	1	0.0289825	0.84844	0.957786	0.0165	0.927407	1	0.0762838	0.595125	1	0.0542162	0.693379	1	0.0787504	0.49851	0.921	0.159012	0.193601	0.855964
BAL062_02543	ABUW_2707	actP_3	copper-transporting P-type ATPase,Copper-transporting P-type ATPase,copper exporting ATPase,Uncharacterized protein conserved in bacteria,heavy metal translocating P-type ATPase,E1-E2 ATPase	2.56773	3.74e-49	7.78e-47	-0.0389289	0.553645	0.916476	-0.0322454	0.651556	0.896239	1.69803	0.00703596	0.164369	0.00560113	0.930381	0.993415	0.0366058	0.586787	0.943463	0.0967583	0.289557	1	-0.019245	0.84377	1	0.00332232	0.967253	1	-0.00369393	0.961711	1
BAL062_02826	ABUW_2890	ytfL	hemolysin,hypothetical protein,hypothetical protein,Putative Mg2+ and Co2+ transporter CorB,gliding motility-associated protein GldE,Domain of unknown function DUF21	1.67894	1.49e-26	1.26e-24	0.136693	0.150221	0.606375	0.058258	0.543084	0.835119	1.5458	0.201834	0.856519	0.0449154	0.633217	0.843508	0.043555	0.67871	0.970146	0.134785	0.258087	1	0.151646	0.135491	0.885788	0.150691	0.1001	0.524643	0.0185456	0.852961	1
BAL062_03668	ABUW_3632	feoB	FeoB,Ferrous iron transport protein B,ferrous iron transport protein B,Fe2+ transport system protein B,ferrous iron transport protein B,Ferrous iron transport protein B	0.273388	0.0588684	0.301498	-0.0738236	0.519688	0.901759	-0.23791	0.0379918	0.187884	-0.63101	0.303243	0.962084	0.471622	1.53098e-07	2.9599e-06	-0.715064	1.02375e-11	7.39604e-10	-0.148951	0.484182	1	-2.29801	1.1199e-38	8.42088e-36	-0.0908732	0.398581	0.898996	-0.827986	2.16504e-05	0.000813502
BAL062_03669	ABUW_3633	BAL062_03669	protein FeoA,FeoA domain	0.0221094	0.949868	1	0.0546464	0.762602	0.968187	-0.222786	0.158891	0.474254	-1.06224	0.569656	1	0.28011	0.132457	0.356647	-0.799059	0.000278702	0.00601589	-0.137114	0.573997	1	-2.0622	1.00934e-12	1.19876e-10	-0.0980777	0.568494	0.943585	-0.911718	2.20264e-05	0.00081892
BAL062_00226	ABUW_0232	BAL062_00226	putative potassium transport system protein kup,potassium transport protein Kup,Uroporphyrinogen-III decarboxylase,potassium uptake protein,K+ potassium transporter	0.628433	0.0217303	0.141107	-0.828812	7.97525e-09	2.78976e-07	-1.02694	3.11e-16	1.89e-14	-0.731635	0.702139	1	0.323882	0.00127556	0.0103745	-0.732949	4.04853e-10	2.34948e-08	-0.475089	0.0146818	0.499602	-0.34671	0.00655049	0.127538	-0.498124	2.02e-05	0.000698416	0.0202225	0.876197	1
BAL062_03768	ABUW_3740	znuA	high affinity Zn transport protein,High-affinity zinc uptake system protein znuA precursor,high-affinity zinc transporter periplasmic component,ABC-type Zn2+ transport system, periplasmic component/surface adhesin,anchored repeat ABC transporter, substrate-binding protein,Periplasmic solute binding protein family	1.15957	8.06964e-12	2.18003e-10	-0.658263	2.47475e-18	2.08174e-16	0.100467	0.137274	0.431624	1.47273	0.0295163	0.334548	-0.876461	1.61306e-21	8.15289e-20	-0.595745	2.9587e-15	2.55459e-13	-0.311852	0.00455994	0.233866	-0.0888832	0.344577	1	-0.362579	8.66878e-06	0.00033221	-0.370294	1.43289e-07	9.54897e-06
BAL062_03769	ABUW_3741	zur	Zn transport system transcriptional repressor,Zinc uptake regulation protein,zinc uptake transcriptional repressor,Ferric uptake regulator family	1.4587	1.65568e-17	6.65845e-16	-0.812143	2.39813e-26	4.2363e-24	0.255194	0.00262765	0.0245456	1.6367	0.00171976	0.0751514	-0.85888	1.63358e-19	7.31596e-18	-0.426637	1.86153e-06	6.2168e-05	-0.244222	0.0141619	0.491268	0.0953165	0.385774	1	-0.158491	0.0259474	0.235909	-0.308167	0.00101788	0.0244567
BAL062_03770	ABUW_3742	znuC	znuC,Zinc import ATP-binding protein ZnuC,high-affinity zinc transporter ATPase,ABC-type spermidine/putrescine transport systems, ATPase components,anchored repeat-type ABC transporter, ATP-binding subunit,ABC transporter	1.37164	3.24384e-13	9.40979e-12	-0.686895	3.22671e-18	2.5909e-16	0.247934	0.00324687	0.0293359	2.53675	1.67105e-05	0.00144308	-0.929138	1.72556e-26	1.03475e-24	-0.541913	3.31009e-12	2.44119e-10	-0.305397	0.00178402	0.127486	0.0495077	0.62985	1	-0.159202	0.0366849	0.291842	-0.172136	0.0211564	0.269047
BAL062_03771	ABUW_3743	znuB	high affinity Zn ABC transporter membrane protein,High-affinity zinc uptake system membrane protein znuB,high-affinity zinc transporter membrane component,anchored repeat-type ABC transporter, permease subunit,ABC 3 transport family	1.03375	1.9501e-06	3.08099e-05	-0.696704	1.3781e-20	1.35246e-18	0.344882	3.83007e-07	9.01599e-06	2.02877	0.000380606	0.0206038	-0.860645	6.57308e-27	4.07992e-25	-0.427334	5.00515e-08	2.33134e-06	-0.198146	0.0266826	0.706201	0.208789	0.0418314	0.474667	-0.128545	0.10861	0.548281	-0.114115	0.13771	0.74597
BAL062_00386	ABUW_0388	corA_1	magnesium and cobalt transport protein,Magnesium transport protein CorA,magnesium/nickel/cobalt transporter CorA,magnesium and cobalt transport protein CorA,CorA-like Mg2+ transporter protein	-1.20727	1.26948e-05	0.000179707	-0.0251705	0.853166	0.993159	-0.366774	0.00797412	0.0581749	-4.8547	0.0242939	0.298543	0.353647	0.00801512	0.0479012	0.550904	3.68426e-06	0.000114406	-0.0474948	0.811219	1	-0.115651	0.439338	1	-1.33668	9.18419e-16	1.63662e-13	-0.0383023	0.784733	1
BAL062_00697	ABUW_0700	yccS_2	inner membrane protein yccS,Inner membrane protein yccS,multidrug efflux system protein MdtO,TIGR01666 family membrane protein,FUSC-like inner membrane protein yccS	-1.49931	1.87231e-16	7.12486e-15	0.0622589	0.412799	0.860932	0.0932192	0.310461	0.675438	-0.196741	0.711319	1	0.0929497	0.136593	0.360915	0.0560936	0.542025	0.929739	0.0536946	0.629835	1	0.0899376	0.453996	1	-0.150224	0.0304356	0.258268	0.0420247	0.678642	1
BAL062_01982	ABUW_2121	BAL062_01982	permease,Sulfite exporter TauE/SafE	0.0215672	0.95255	1	-0.0479666	0.724381	0.958157	-0.214114	0.0754951	0.304307	3.28509	0.00263105	0.0994044	-0.0895708	0.511234	0.760937	-0.122425	0.378431	0.859849	-0.193828	0.18635	1	0.110201	0.407638	1	0.0119727	0.941918	1	-0.134005	0.294613	0.937206
BAL062_00181	ABUW_0187	BAL062_00181	34 kDa Outer Membrane Protein	-0.273687	0.0466279	0.253871	-0.0845855	0.415333	0.863668	1.21468	7.92938e-37	1.55548e-34	-0.394138	0.842172	1	-0.592825	1.02958e-08	2.20766e-07	-0.352099	0.00334457	0.0489247	0.227699	0.0725398	0.974417	0.318274	0.000954719	0.0253855	0.437498	0.000305407	0.00697736	0.815418	1.17842e-16	1.98199e-14
BAL062_00381	ABUW_0383	ttg2A	toluene tolerance efflux transporter (ABC superfamily, ATP-bind),Uncharacterized ABC transporter ATP-binding protein HI_1087,putative ABC transporter ATP-binding protein YrbF,ABC-type spermidine/putrescine transport systems, ATPase components,putative 2-aminoethylphosphonate ABC transporter, ATP-binding protein,ABC transporter	0.535038	0.00224307	0.0198455	-0.876555	1.87103e-08	6.17789e-07	1.18245	3.25915e-14	1.82667e-12	-0.55014	0.598533	1	-1.28269	1.76963e-68	3.13048e-66	-1.05967	7.52167e-27	1.33134e-24	0.237299	0.227227	1	0.240097	0.0336237	0.415977	0.347743	0.0419397	0.318028	0.0526276	0.663683	0.995807
BAL062_00382	ABUW_0384	ttg2B	toluene tolerance efflux ABC transporter,Probable phospholipid ABC transporter permease protein mlaE,conserved hypothetical protein,Domain of unknown function DUF140	0.297448	0.0715624	0.343635	-0.426619	0.000652058	0.0104715	1.15452	1.56806e-11	6.15202e-10	-0.168986	0.882085	1	-1.09822	4.47811e-42	4.28204e-40	-0.647734	1.41957e-12	1.06921e-10	0.359807	0.0179632	0.556411	0.643774	2.18421e-09	1.69181e-07	0.419884	0.0176201	0.177899	0.537592	5.58159e-07	3.2857e-05
BAL062_00383	ABUW_0385	ttg2C	toluene tolerance efflux transporter (ABC superfamily, PerI-bind),Probable phospholipid ABC transporter-binding protein mlaD,virulence factor Mce family protein,mce related protein	0.541372	0.00176157	0.0159036	-0.936549	5.66099e-09	2.04085e-07	1.2453	8.32735e-13	3.67548e-11	0.178066	0.850107	1	-1.28707	2.51418e-66	4.04325e-64	-1.10404	1.92221e-28	4.00272e-26	0.313119	0.14813	1	0.200246	0.192257	1	0.302483	0.0877221	0.492349	-0.00504859	0.972846	1
BAL062_00384	ABUW_0386	mlaC	toluene tolerance protein (Ttg2D),Probable phospholipid-binding protein mlaC precursor,ABC transporter periplasmic binding protein MlaC,hopanoid biosynthesis associated membrane protein HpnM,Toluene tolerance, Ttg2	0.711376	3.47311e-05	0.000455234	-0.936534	6.18161e-10	2.5103e-08	1.34042	1.98748e-13	1.00254e-11	-0.382889	0.783174	1	-1.386	4.33165e-65	6.66321e-63	-0.986361	1.52475e-30	3.37352e-28	0.241147	0.173261	1	0.211084	0.121937	0.870837	0.386128	0.0259057	0.235909	0.126573	0.325088	0.961651

## Sheet: PG
Peptidoglycan
BAL062	AB5075
locus_tag	locus_tag	gene_name	function	logFC_AgNO3	PValue	q.value	logFC_BZK	PValue	q.value	logFC_CTAB	PValue	q.value	logFC_CHL	PValue	q.value	logFC_TRC	PValue	q.value	logFC_CRL	PValue	q.value	logFC_PVPi	PValue	q.value	logFC_HClO	PValue	q.value	logFC_GLU	PValue	q.value	logFC_EtOH	PValue	q.value
BAL062_01226	ABUW_1244	mrdB	EsvE3,Rod shape-determining protein RodA,cell wall shape-determining protein,rod shape-determining protein RodA,Cell cycle protein	-2.24755	4.88535e-11	1.23495e-09	-0.108735	0.460458	0.891682	0.0882094	0.587645	0.86332	1.33628	0.05679	0.470694	0.61591	3.61008e-15	1.31675e-13	-0.0145641	0.903954	1	-0.0866113	0.52605	1	-1.1672	1.5726e-13	2.33465e-11	0.214529	0.115117	0.564398	-0.542288	1.04267e-05	0.000466165
BAL062_00713	ABUW_0715	mreB	rod shape-determining protein MreB,Rod shape-determining protein MreB,rod shape-determining protein MreB,Ethanolamine utilization protein, possible chaperonin,cell shape determining protein, MreB/Mrl family,MreB/Mbl protein	-2.64267	2.88803e-19	1.31035e-17	-0.169718	0.286856	0.775081	-0.0165199	0.931607	1	1.01721	0.0825974	0.578341	0.149271	0.02516	0.114974	-0.212873	0.127756	0.605183	-0.262824	0.110323	1	-1.2061	1.06231e-11	1.08143e-09	0.0204658	0.892974	1	-0.727623	3.14945e-07	1.92026e-05
BAL062_00714	ABUW_0716	mreC	rod shape-determining protein MreC,rod shape-determining protein MreC,rod shape-determining protein MreC,rod shape-determining protein MreC	-2.24292	5.25232e-16	1.93625e-14	-0.144772	0.340126	0.8189	0.0685527	0.701168	0.923736	1.27018	0.0344188	0.362898	0.450932	1.52949e-14	5.20319e-13	-0.111319	0.406319	0.87652	-0.247738	0.115132	1	-1.27734	4.80991e-15	1.14251e-12	0.150655	0.264919	0.788783	-0.721755	5.07102e-08	3.65527e-06
BAL062_00715	ABUW_0717	BAL062_00715	rod shape-determining protein,rod shape-determining protein MreD,rod shape-determining protein MreD,rod shape-determining protein MreD	-2.2528	7.46337e-08	1.38287e-06	-0.12619	0.403221	0.852021	-0.0278653	0.883665	0.991805	-0.809859	0.696951	1	0.550934	7.92399e-08	1.5839e-06	-0.0285194	0.856335	1	-0.249239	0.141848	1	-1.25709	1.11916e-10	9.72581e-09	0.15602	0.307939	0.823658	-0.658753	8.473e-05	0.00286513
BAL062_01224	ABUW_1242	BAL062_01224	rare lipoprotein A,RlpA-like protein precursor,rare lipoprotein A,rare lipoprotein A,Rare lipoprotein A (RlpA)-like double-psi beta-barrel	-1.83984	0.00013937	0.0016496	-0.0501917	0.849561	0.991788	0.232171	0.303861	0.667936	-5.82202	0.0128308	0.209628	0.0342449	0.848144	0.957786	-0.624903	0.0551624	0.395294	0.299907	0.203021	1	-0.775095	0.00129478	0.032488	0.0177157	0.939043	1	-0.667509	0.0027762	0.0570089
BAL062_02665	ABUW_2859	zapA	Uncharacterized protein conserved in bacteria,Cell division protein ZapA	-2.33714	1.22e-09	2.68e-08	0.0756126	0.664299	0.948609	0.405997	0.0144239	0.0928247	-6.4193	0.0123419	0.208053	-0.238231	0.145878	0.377117	-1.2028	0.0004821	0.0099223	-0.281921	0.147047	1	-0.406582	0.0924651	0.732298	-0.55129	0.00210557	0.0352313	-0.0268133	0.898117	1
BAL062_03155	ABUW_3128	zipA	cell division protein,Cell division protein ZipA,cell division protein ZipA,cell division protein ZipA,ZipA, C-terminal FtsZ-binding domain	-2.77763	6.45e-29	6.52e-27	-0.280513	0.0747193	0.422373	-0.066286	0.671344	0.905947	-5.33504	0.01706	0.250903	-0.650188	8.81216e-06	0.000127776	-1.60655	1.06218e-07	4.6421e-06	-0.875148	2.14e-07	5.88e-05	-1.16457	5.36e-05	0.00189259	-1.29573	1.26e-15	2.14e-13	-1.72129	2.99e-24	1.06e-21
BAL062_02646	ABUW_2840	mltD	soluble lytic murein transglycosylase,Membrane-bound lytic murein transglycosylase D precursor,membrane-bound lytic murein transglycosylase D,Oxidation resistance protein,spore coat assembly protein SafA,LysM domain	-2.24127	7.06e-36	8.92e-34	-0.0439916	0.610573	0.93275	0.175091	0.0433065	0.204304	-2.82641	0.0452711	0.426224	-0.211697	0.003431	0.0236625	-0.145909	0.171981	0.682099	0.110168	0.266387	1	-0.423227	4.99e-05	0.00177839	-0.297059	0.000245549	0.00575748	0.0408113	0.594337	0.990582
BAL062_01038	ABUW_1134	ampG_2	Putative transporter,hypothetical protein,muropeptide transporter,AmpG-like permease,Major Facilitator Superfamily	-0.97629	4.84e-07	8.2e-06	-0.404076	0.000543637	0.00901723	-0.515234	5.71e-06	0.000111488	0.253532	0.900666	1	-1.07407	3.67e-15	1.33e-13	0.853037	1.8e-19	2.27e-17	0.107869	0.408104	1	0.124181	0.346172	1	0.346306	0.00126481	0.0228055	0.498319	4.46e-06	0.000218719
BAL062_03876	ABUW_3837	ampD	ampD,1,6-anhydro-N-acetylmuramyl-L-alanine amidase AmpD,N-acetyl-anhydromuranmyl-L-alanine amidase,N-acetylmuramoyl-L-alanine amidase	-1.8448	7.14e-22	4.36e-20	0.306722	3.83e-06	9.34e-05	0.295929	4.43e-05	0.000721203	-1.82851	0.211497	0.866702	0.537603	3.84e-12	1.06e-10	0.0109199	0.920575	1	0.351995	0.000271565	0.026222	-0.387666	5.42e-05	0.00189378	0.365473	3.69e-06	0.000158558	-0.020186	0.775968	1
BAL062_02811	ABUW_2876	ftsI_2	pbpA,Peptidoglycan synthase FtsI precursor,penicillin-binding protein 2,Membrane carboxypeptidase/penicillin-binding protein,penicillin-binding protein 2,Penicillin binding protein transpeptidase domain	-2.01244	3.66727e-14	1.12856e-12	-0.119353	0.404974	0.854194	-0.0596214	0.778949	0.953699	0.126112	0.867182	1	0.358247	1.51477e-08	3.20914e-07	-0.112319	0.332662	0.836381	-0.0685117	0.698004	1	-0.992229	6.96943e-12	7.52487e-10	0.339803	0.00413757	0.0611879	-0.341269	0.00814643	0.135723
BAL062_01261	ABUW_1358	mrcB	mrcB,Murein polymerase,bifunctional glycosyl transferase/transpeptidase,Membrane carboxypeptidase/penicillin-binding protein,penicillin-binding protein 1B,Transglycosylase	-0.236555	0.103697	0.437448	0.000878088	0.99159	1	0.0759383	0.411214	0.758511	-3.78406	5.70136e-07	6.46214e-05	0.220631	0.000310584	0.00308665	-0.169828	0.0525388	0.382238	-0.00757266	0.947302	1	-0.0685627	0.557641	1	-0.065576	0.340343	0.851064	-0.189634	0.0557214	0.482373
BAL062_01035	ABUW_1131	nlpD_1	nlpD,Murein hydrolase activator NlpD precursor,lipoprotein NlpD,Membrane-bound metallopeptidase,Peptidase family M23	0.00879466	0.953053	1	0.18902	0.013009	0.131457	0.103352	0.263719	0.619556	-2.28523	7.29516e-05	0.00508838	0.0154332	0.814617	0.942484	-0.149643	0.104104	0.563924	0.0482288	0.666261	1	-0.177977	0.137627	0.890737	-0.163503	0.0263264	0.237537	-0.135065	0.179064	0.839914
BAL062_00905	ABUW_0992	pal	pal,Peptidoglycan-associated lipoprotein precursor,peptidoglycan-associated outer membrane lipoprotein,Outer membrane protein and related peptidoglycan-associated (lipo)proteins,peptidoglycan-associated lipoprotein,OmpA family	0.0833826	0.503007	0.877306	-0.0946966	0.182948	0.665528	-0.10291	0.154034	0.464849	-6.18111	8.77945e-05	0.00589686	0.106793	0.0857174	0.271746	0.0588742	0.397934	0.873223	0.0251351	0.788186	1	-0.301009	0.00465115	0.0957922	-0.0719141	0.36048	0.866318	0.0576284	0.42727	0.987691
BAL062_00906	ABUW_0993	tolB	tolB,hypothetical protein,translocation protein TolB,Tol-Pal system beta propeller repeat protein TolB,WD40-like Beta Propeller Repeat	0.0609465	0.641852	0.930423	-0.0551361	0.408493	0.857119	-0.00348199	0.967013	1	-5.76451	0.000764491	0.0374704	0.120673	0.0326322	0.138772	0.0583923	0.376781	0.858304	0.0755983	0.436668	1	-0.252939	0.011757	0.197595	-0.0803379	0.290881	0.808027	0.1658	0.0120967	0.176552
BAL062_00907	ABUW_0994	tolA_1	protein TolA,protein TolA	0.0848988	0.476684	0.869097	-0.16838	0.0223836	0.189643	-0.0939058	0.179297	0.506477	-5.81588	7.41755e-06	0.000672587	0.0826474	0.116209	0.330505	0.066039	0.345859	0.846087	0.0101112	0.913501	1	-0.238212	0.00708387	0.133544	-0.156749	0.0292734	0.251399	0.0633199	0.443866	0.987691
BAL062_00908	ABUW_0995	exbD_1	tolR,Biopolymer transport protein exbD,colicin uptake protein TolR,protein TolR,Biopolymer transport protein ExbD/TolR	0.317195	0.228842	0.6564	-0.430569	0.0106541	0.115819	-0.196254	0.173673	0.498872	-7.15433	0.00500977	0.146569	0.326422	0.0125003	0.0674179	-0.104881	0.484677	0.913682	-0.230244	0.186732	1	-0.0619969	0.694471	1	-0.146197	0.298064	0.814484	0.0917673	0.53285	0.990582
BAL062_00909	ABUW_0996	tolQ_1	tolQ,hypothetical protein,colicin uptake protein TolQ,Uncharacterized conserved protein,protein TolQ,MotA/TolQ/ExbB proton channel family	0.0278943	0.836545	0.991397	-0.0934128	0.209925	0.70303	0.0118198	0.872496	0.991395	-5.0014	0.00850879	0.180616	0.226116	0.000743373	0.00664155	0.161138	0.0430659	0.339903	0.134452	0.159732	1	-0.175283	0.081141	0.685084	0.0747315	0.347128	0.853109	0.129924	0.0757994	0.56146
BAL062_03294	ABUW_3259	mlaA	putative lipoprotein precursor (VacJ) transmembrane,Probable phospholipid-binding lipoprotein mlaA precursor,ABC transporter outer membrane lipoprotein,VacJ like lipoprotein	0.0701473	0.66048	0.93093	0.340929	0.0313769	0.242041	0.790968	7.07e-07	1.6e-05	4.85078	2.91e-16	2.64e-13	-1.24707	6.02e-52	6.87e-50	-0.794435	7.72e-21	1.01e-18	0.3293	0.109741	1	0.355656	0.0157752	0.242272	0.418841	0.000580065	0.0118813	0.317862	0.0230948	0.282252

## Sheet: K-CSU-LOS
K-CSU-LOS
BAL062	AB5075
locus_tag	locus_tag	gene_name	function	logFC_AgNO3	PValue	q.value	logFC_BZK	PValue	q.value	logFC_CTAB	PValue	q.value	logFC_CHL	PValue	q.value	logFC_TRC	PValue	q.value	logFC_CRL	PValue	q.value	logFC_PVPi	PValue	q.value	logFC_HClO	PValue	q.value	logFC_GLU	PValue	q.value	logFC_EtOH	PValue	q.value
BAL062_03850	ABUW_3815	manB	phosphomannomutase,Phosphomannomutase/phosphogluc omutase,phosphomannomutase CpsG,phosphoglucosamine mutase,Phosphoglucomutase/phosphomannomutase, alpha/beta/alpha domain I	0.180228	0.54586	0.893533	-0.475628	0.0505266	0.329446	2.64241	1.09871e-51	3.52686e-49	2.88433	0.226226	0.887681	1.23394	3.79652e-12	1.05764e-10	2.83896	2.51949e-11	1.65166e-09	1.60725	1.62193e-13	2.89757e-10	1.27901	2.22688e-10	1.88914e-08	1.56044	2.24441e-18	6.62073e-16	1.91863	6.19643e-08	4.29133e-06
BAL062_03853	ABUW_3816	galE_2	UDP-glucose 4-epimerase,UDP-glucose 4-epimerase,UDP-galactose-4-epimerase,Putative NADH-flavin reductase,UDP-glucose 4-epimerase,NAD dependent epimerase/dehydratase family	-3.93503	9.48821e-20	4.53767e-18	-1.51608	3.73813e-09	1.37571e-07	1.41107	5.73371e-05	0.000911969	-3.99406	3.10766e-07	3.88672e-05	0.576272	0.0240227	0.110811	0.574266	0.109788	0.569032	0.910274	0.00226105	0.144263	1.81371	0.000628354	0.0173552	1.00505	0.000136434	0.00352357	0.851565	0.090524	0.61134
BAL062_03854	ABUW_3817	pgi	glucose-6-phosphate isomerase,Glucose-6-phosphate isomerase,glucose-6-phosphate isomerase,Phosphoglucose isomerase	-2.8803	1.06946e-56	3.78481e-54	-1.36274	4.00577e-09	1.45901e-07	2.34896	3.48641e-18	2.6762e-16	-1.63747	0.415936	1	0.586227	0.00245352	0.0179351	1.12446	0.000241802	0.00528382	1.39674	0.00027888	0.026222	2.02965	2.61236e-07	1.47743e-05	1.25053	1.41612e-09	1.09719e-07	1.45237	0.000179818	0.00542836
BAL062_03855		tuaD_1	Udg,UDP-glucose 6-dehydrogenase tuaD,UDP-glucose 6-dehydrogenase,nucleotide sugar dehydrogenase,UDP-glucose/GDP-mannose dehydrogenase family, UDP binding domain	-0.941601	0.00240564	0.0210732	0.626534	0.0750086	0.423187	2.49796	3.92201e-73	2.76972e-70	0.563085	0.790382	1	1.44485	1.87327e-19	8.28452e-18	1.75133	7.026e-09	3.65765e-07	1.29755	2.5526e-12	3.04015e-09	1.18858	1.12971e-13	1.75006e-11	1.86343	9.02468e-19	3.32834e-16	1.35555	1.25212e-05	0.000532829
BAL062_03856	ABUW_3819	galU	galU,UTP--glucose-1-phosphate uridylyltransferase,UTP--glucose-1-phosphate uridylyltransferase subunit GalU,CTP:phosphocholine cytidylyltransferase involved in choline phosphorylation for cell surface LPS epitopes,UTP-glucose-1-phosphate uridylyltransferase,Nucleotidyl transferase	-2.91234	4.34763e-61	2.19804e-58	-1.10208	3.70929e-08	1.17008e-06	2.16625	5.61051e-13	2.53984e-11	1.38905	0.0559432	0.466817	0.80573	0.00128823	0.0104536	1.43977	9.52856e-05	0.00229463	1.28286	0.000143379	0.0160091	1.96905	9.99059e-08	5.93274e-06	1.44664	1.60656e-13	1.84703e-11	1.67561	4.76459e-05	0.00168285
BAL062_03857		wcaJ	WeeH,Putative colanic biosynthesis UDP-glucose lipid carrier transferase,undecaprenyl-phosphate galactose phosphotransferase,exopolysaccharide biosynthesis polyprenyl glycosylphosphotransferase,Bacterial sugar transferase	-3.31086	1.35649e-59	6.00076e-57	-0.206998	0.349738	0.820243	0.585442	0.0299837	0.16069	0.00935688	0.990295	1	0.628558	0.00533786	0.0348138	0.31529	0.327004	0.829924	0.379814	0.137079	1	1.05617	0.0415823	0.474123	0.531853	0.0155955	0.162998	0.260783	0.585994	0.990582
BAL062_03858		lsgF	putative UDP-galactose--lipooligosaccharide galactosyltransferase,putative glycosyl transferase,Predicted glycosyl hydrolase,poly-beta-1,6 N-acetyl-D-glucosamine synthase,Glycosyl transferase family 2	-3.18327	3.5788e-53	9.74261e-51	0.172927	0.359145	0.825007	1.15346	7.43228e-06	0.000140339	3.25294	8.37666e-09	1.44677e-06	0.64281	0.00182541	0.0141011	0.839144	0.0138786	0.160034	0.726994	0.0139181	0.487542	1.13563	0.0193552	0.280336	0.838986	1.2359e-05	0.000449462	0.60547	0.140078	0.751908
BAL062_03866		neuA	Putative NeuA,N-acylneuraminate cytidylyltransferase,3-deoxy-manno-octulosonate cytidylyltransferase,Spore coat polysaccharide biosynthesis protein, predicted glycosyltransferase,pseudaminic acid CMP-transferase,Cytidylyltransferase	-1.00345	3.92542e-08	7.3894e-07	0.501288	2.96702e-10	1.26295e-08	0.954221	6.84873e-22	6.90939e-20	1.70282	0.0013586	0.0615955	0.639074	9.35746e-16	3.52199e-14	0.807724	2.11388e-05	0.000580088	0.300321	0.00464722	0.233866	0.600717	2.93422e-05	0.0011122	0.771446	2.76591e-22	1.40824e-19	0.161139	0.0876249	0.598629
BAL062_03869	ABUW_3830	tuaD_2	UDP-glucose/GDP-mannose dehydrogenase,UDP-glucose 6-dehydrogenase tuaD,Vi polysaccharide biosynthesis protein TviB,nucleotide sugar dehydrogenase,UDP-glucose/GDP-mannose dehydrogenase family, NAD binding domain	-0.0222863	0.913906	1	-1.89288	1.20842e-23	1.47219e-21	1.53701	6.05512e-41	1.42538e-38	7.69426	2.67041e-31	9.68559e-28	-1.83787	4.87262e-29	3.31525e-27	-1.07228	1.20608e-05	0.000347117	0.407195	0.0472738	0.894612	1.67884	7.31826e-44	1.30375e-40	-0.0950981	0.542827	0.934976	0.661724	0.14308	0.766857
BAL062_00584	ABUW_0589	BAL062_00584	glycosyltransferase,Uncharacterized protein conserved in bacteria	-1.03437	3.54265e-15	1.20552e-13	-1.3367	1.01751e-22	1.15963e-20	0.623261	2.9179e-09	9.28207e-08	-3.04063	0.0790724	0.568097	-0.169713	0.0627031	0.218565	-0.0503703	0.59585	0.947007	0.149849	0.164875	1	0.474095	7.1876e-06	0.00031231	0.138738	0.128971	0.589514	0.258947	0.000824361	0.0203611
BAL062_00585	ABUW_0590	icaB	putative polysaccharide deacetylase,Poly-beta-1,6-N-acetyl-D-glucosamine N-deacetylase precursor,outer membrane N-deacetylase,poly-beta-1,6-N-acetyl-D-glucosamine N-deacetylase PgaB,Polysaccharide deacetylase	-1.45354	1.03252e-14	3.29198e-13	-2.20483	1.23173e-16	8.21078e-15	1.01918	1.6724e-08	4.70688e-07	-4.92047	0.0269159	0.314077	-2.31691	4.10911e-19	1.79482e-17	-1.46551	1.50677e-08	7.40826e-07	0.376265	0.10456	1	1.0884	5.58764e-07	2.97145e-05	0.030811	0.8814	1	0.216542	0.284473	0.933187
BAL062_00586	ABUW_0591	lpsC	lipopolysaccharide core biosynthesis glycosyl transferase LpsC,SPBc2 prophage-derived glycosyltransferase SunS,putative glycosyl transferase,transferase 2, rSAM/selenodomain-associated,Glycosyl transferase family 2	-1.12795	1.55543e-11	4.13885e-10	-2.54605	1.56386e-107	1.8417e-104	0.20351	0.0898353	0.339624	1.64516	0.238444	0.900362	-2.35239	5.44743e-119	1.9273e-116	-1.29434	1.6077e-37	7.11407e-35	-0.0723266	0.49962	1	0.312892	0.00217828	0.0503975	-0.249962	0.0115945	0.136379	-0.170294	0.0547944	0.479044
BAL062_00587	ABUW_0592	BAL062_00587	glycosyltransferase,UDP-D-galactose:(glucosyl)lip opolysaccharide-1,6-D-galactosyltransferase,sugar transferase, PEP-CTERM/EpsH1 system associated,Glycosyl transferases group 1	-1.48143	6.92343e-19	3.02494e-17	-2.26207	3.39669e-123	6.00025e-120	-0.0993766	0.188146	0.521873	-6.31473	0.000299122	0.0171139	-0.131829	0.0676278	0.230286	-0.323193	2.07517e-06	6.80195e-05	-0.0480941	0.643266	1	0.0841251	0.423437	1	-0.327347	1.63059e-05	0.00057539	-0.00171212	0.983529	1
BAL062_00588	ABUW_0593	BAL062_00588	hypothetical protein	-0.768976	8.60985e-05	0.001058	-0.849288	1.27206e-08	4.28019e-07	1.10823	1.58379e-18	1.25843e-16	-1.82188	0.370678	0.989521	-0.305796	0.011449	0.0628008	0.381361	0.000138021	0.00321444	0.444198	0.00596106	0.283985	0.796887	6.69989e-14	1.13675e-11	0.571751	3.59205e-06	0.000156123	0.772363	4.28055e-10	3.87664e-08
BAL062_00589		BAL062_00589	glycosyltransferase involved in LPS biosynthesis,Glycosyltransferase family 25 (LPS biosynthesis protein)	-0.401102	0.00318772	0.027184	-1.06074	2.01407e-17	1.42314e-15	0.434246	1.99168e-06	4.2622e-05	-0.818093	0.680045	1	0.294064	7.77281e-05	0.000898699	-0.0167743	0.859974	1	0.236463	0.0492067	0.894612	0.519417	1.02796e-06	5.08696e-05	0.0465409	0.634892	0.965477	0.31505	0.000577948	0.0149001
BAL062_00591	ABUW_0597	BAL062_00591	hypothetical protein	-0.140394	0.652244	0.930714	-0.068992	0.703063	0.956571	0.0708918	0.637853	0.891244	-10.5032	0.00126019	0.0585986	0.115839	0.458721	0.727864	-0.0737991	0.683904	0.970237	0.0141112	0.936071	1	-0.0963912	0.570874	1	0.226015	0.111867	0.56125	0.207346	0.170247	0.8258
BAL062_02130	ABUW_2265	gtaB	Putative nucleotidyl transferase,UTP--glucose-1-phosphate uridylyltransferase,glucose-1-phosphate thymidylyltransferase RfbA,CTP:phosphocholine cytidylyltransferase involved in choline phosphorylation for cell surface LPS epitopes,UDP-N-acetylglucosamine diphosphorylase/glucosamine-1-phosphate N-acetyltransferase,Nucleotidyl transferase	-0.50476	0.00456272	0.037994	1.00226	4.78541e-37	1.53699e-34	0.455389	1.70069e-07	4.22898e-06	2.96542	5.22054e-07	6.31163e-05	1.02339	5.85399e-53	7.14186e-51	0.387898	4.12838e-06	0.000125934	0.238633	0.069228	0.954567	-0.418644	0.000164247	0.0053201	0.621472	2.41497e-18	6.62073e-16	-0.369868	1.07489e-05	0.000474564
BAL062_03605	ABUW_3570	lpxO	beta-hydroxylase,Aspartyl/Asparaginyl beta-hydroxylase	0.137642	0.344201	0.769992	-0.878759	2.95e-15	1.77e-13	0.268259	0.00149844	0.0152919	1.23807	0.0506272	0.439889	-1.25717	2.87e-85	5.98e-83	-0.175524	0.00798002	0.104627	-0.0683128	0.555141	1	-0.0331266	0.770671	1	-0.0278565	0.791154	1	0.07966	0.329284	0.96568
BAL062_00890	ABUW_0977	htrB_1	lipid A biosynthesis lauroyl acyltransferase,Lipid A biosynthesis lauroyl acyltransferase,lipid A biosynthesis lauroyl acyltransferase,Lauroyl/myristoyl acyltransferase,lipid A biosynthesis lauroyl (or palmitoleoyl) acyltransferase,Bacterial lipid A biosynthesis acyltransferase	0.617792	0.052969	0.27937	0.175728	1	1	3.311	6.21e-14	3.37e-12	-4.73854	0.212212	0.866702	-3.21504	6.75e-06	9.99e-05	0.280845	0.500322	0.913682	0.923263	0.212899	1	2.7372	5.19e-08	3.14e-06	2.26707	8.55e-06	0.000331837	3.05769	1.69e-11	1.7e-09
BAL062_03480	ABUW_3447	htrB_3	htrB,Lipid A biosynthesis lauroyl acyltransferase,lipid A biosynthesis lauroyl acyltransferase,Lauroyl/myristoyl acyltransferase,lipid A biosynthesis lauroyl (or palmitoleoyl) acyltransferase,Bacterial lipid A biosynthesis acyltransferase	0.0308125	0.860321	0.991564	-1.06923	1.26e-21	1.31e-19	1.21247	7.55e-64	2.96e-61	4.39876	2.69e-14	1.63e-11	-0.585532	7.51e-19	3.2e-17	0.500181	1.12e-06	3.91e-05	-0.00760241	0.951541	1	0.606167	2.67e-06	0.000121991	0.447728	3.97e-09	3.01e-07	0.812531	3.01e-20	7.1e-18
BAL062_03481	ABUW_3448	mfpsA	glycosyltransferase,Mannosylfructose-phosphate synthase,lipopolysaccharide 1,2-N-acetylglucosaminetransferase,Glycogen synthase,sugar transferase, PEP-CTERM/EpsH1 system associated,Glycosyl transferases group 1	-1.31255	3.44e-09	7.33e-08	-2.34601	9.85e-18	7.56e-16	0.534211	0.000895387	0.0100051	5.71214	2.85e-13	1.48e-10	-2.2514	2.29e-21	1.14e-19	-1.66886	1.19e-11	8.42e-10	-0.174843	0.383322	1	1.08188	8.96e-09	6.26e-07	-0.689389	0.000759717	0.0151264	0.204044	0.568728	0.990582
BAL062_01695	ABUW_1803	BAL062_01695	Outer membrane phospholipase A,Putative phospholipase A1 precursor,phospholipase A,Phospholipase A1	-0.0710754	0.60003	0.91649	-1.2387	5.3e-55	3.12e-52	-0.303674	1.14e-05	0.000210287	-0.428939	0.665493	1	-0.188122	0.00781833	0.047077	-0.00781334	0.908328	1	-0.117524	0.175678	1	0.0460002	0.666001	1	-0.260209	0.00167055	0.0289021	-0.0467518	0.484764	0.987691
BAL062_03206	ABUW_3180	bmfS	Signal transduction histidine kinase,Sensor protein RstB,sensor protein RstB,Signal transduction histidine kinase regulating C4-dicarboxylate transport system,phosphate regulon sensor kinase PhoR,Histidine kinase-, DNA gyrase B-, and HSP90-like ATPase	-0.504964	0.120051	0.47737	-1.14951	1.05914e-24	1.49678e-22	-1.66744	4.08879e-29	5.34723e-27	-4.66722	0.030216	0.339298	-1.2893	4.43554e-14	1.43972e-12	-0.612392	5.11732e-06	0.000150961	-0.263463	0.118937	1	-0.406729	0.000184978	0.00583254	-0.146403	0.183277	0.678015	-0.717702	1.59995e-11	1.66206e-09
BAL062_03207	ABUW_3181	bmfR	two-component regulatory system response regulator,Transcriptional regulatory protein RstA,DNA-binding transcriptional regulator RstA,Response regulator of citrate/malate metabolism,phosphate regulon transcriptional regulatory protein PhoB,Transcriptional regulatory protein, C terminal	0.401302	0.411309	0.822386	-2.31755	4.81999e-21	4.86543e-19	-1.99669	7.61621e-15	4.48214e-13	-6.91237	0.00699586	0.164369	-3.92234	2.23782e-37	1.84126e-35	-2.4485	4.21972e-19	5.15096e-17	-1.37047	2.36591e-08	1.05667e-05	-1.3569	6.68212e-09	4.85885e-07	-0.0682765	0.744265	0.983312	-1.30517	1.7522e-06	9.54061e-05
BAL062_01328	ABUW_1486	BAL062_01328	TetR family transcriptional regulator,transcriptional regulator BetI,transcriptional repressor BetI,Bacterial regulatory proteins, tetR family	-1.86032	3.19542e-07	5.57073e-06	-1.79642	1.23669e-21	1.31386e-19	-2.90969	1.97673e-73	1.74496e-70	-6.59235	0.00493707	0.146569	-2.49784	8.28466e-102	2.09365e-99	-1.21563	5.93249e-27	1.10532e-24	-0.658214	7.14085e-06	0.00115974	-0.790719	6.64147e-07	3.4295e-05	0.0173119	0.933729	1	-0.348677	0.00337367	0.0654613
BAL062_01329	ABUW_1487	CsuA/B	protein CsuA/B,Uncharacterized secreted protein,Spore Coat Protein U domain	-1.77342	2.01591e-22	1.25163e-20	-1.51198	3.52995e-30	6.92851e-28	-2.85642	8.59599e-83	1.01175e-79	-5.97499	2.35336e-09	5.02096e-07	-2.60576	6.18116e-92	1.45793e-89	-1.25057	6.28651e-33	1.85452e-30	-0.519647	5.32028e-05	0.00633645	-0.492677	0.00813	0.149714	0.287844	0.128038	0.588116	-0.0990292	0.407913	0.987691
BAL062_01330	ABUW_1488	CsuA	protein CsuA,Uncharacterized secreted protein	-1.21614	0.0048019	0.0395208	-1.59703	4.9341e-40	1.93691e-37	-3.0699	1.36407e-119	4.81655e-116	-4.99445	0.020149	0.281078	-2.42006	6.80758e-42	6.33822e-40	-1.33134	1.09875e-31	2.59304e-29	-0.603654	1.42465e-06	0.000318142	-0.48571	0.008338	0.151573	0.0299641	0.878064	1	-0.216462	0.0152991	0.209444
BAL062_01331	ABUW_1489	CsuB	protein CsuB,Uncharacterized secreted protein,Spore Coat Protein U domain	-1.21791	0.000588713	0.00610983	-1.86724	2.079e-20	1.88336e-18	-2.98317	1.04294e-45	2.63043e-43	-3.5602	0.0649981	0.500527	-2.49737	2.6827e-40	2.43369e-38	-1.17672	4.62757e-32	1.17011e-29	-0.677176	9.9379e-08	3.50958e-05	-0.554569	0.00434556	0.0910778	0.0855603	0.625417	0.961047	-0.246129	0.00287204	0.0582992
BAL062_01332	ABUW_1490	CsuC	P pilus assembly protein, chaperone PapD,putative chaperone protein EcpD,Gram-negative pili assembly chaperone, N-terminal domain	-1.47781	3.35081e-08	6.37554e-07	-1.77232	4.75283e-36	1.39931e-33	-2.91689	9.4328e-53	3.33072e-50	-6.13204	8.97806e-05	0.00592062	-2.5924	2.10921e-67	3.55352e-65	-1.2552	1.0801e-36	4.24838e-34	-0.77196	1.32747e-09	1.17412e-06	-0.600053	0.00169701	0.0400427	0.0113378	0.962641	1	-0.200013	0.0209327	0.268431
BAL062_01333	ABUW_1491	CsuD	protein CsuD,F1 capsule-anchoring protein precursor,fimbrial outer membrane usher protein PefC,Fimbrial Usher protein	-1.29656	1.39151e-05	0.000195418	-1.74526	1.61838e-24	2.19912e-22	-2.97811	3.49033e-68	1.54055e-65	-5.91391	1.11212e-09	2.88119e-07	-2.43003	1.59887e-55	2.1757e-53	-1.31358	6.31832e-34	2.23669e-31	-0.682774	2.23279e-06	0.000419883	-0.587563	0.00295799	0.0667044	0.0881705	0.669129	0.967063	-0.189291	0.0997236	0.638087
BAL062_01334	ABUW_1492	CsuE	protein CsuE; secreted protein related to type I pili,Uncharacterized secreted protein,Spore Coat Protein U domain	-1.2826	3.51233e-07	6.06348e-06	-1.83433	1.28286e-31	2.66609e-29	-3.05187	8.39057e-105	1.48136e-101	-6.04622	5.34059e-05	0.00387407	-3.00379	2.56465e-140	1.51229e-137	-1.48988	5.24981e-48	3.71686e-45	-0.767531	1.90801e-08	9.73903e-06	-0.569887	0.00187448	0.0439393	0.0153672	0.945076	1	-0.187639	0.023915	0.289108
